# Supplementary material
Source: PubMed Central journal article supplement (PMC4377233)

**A**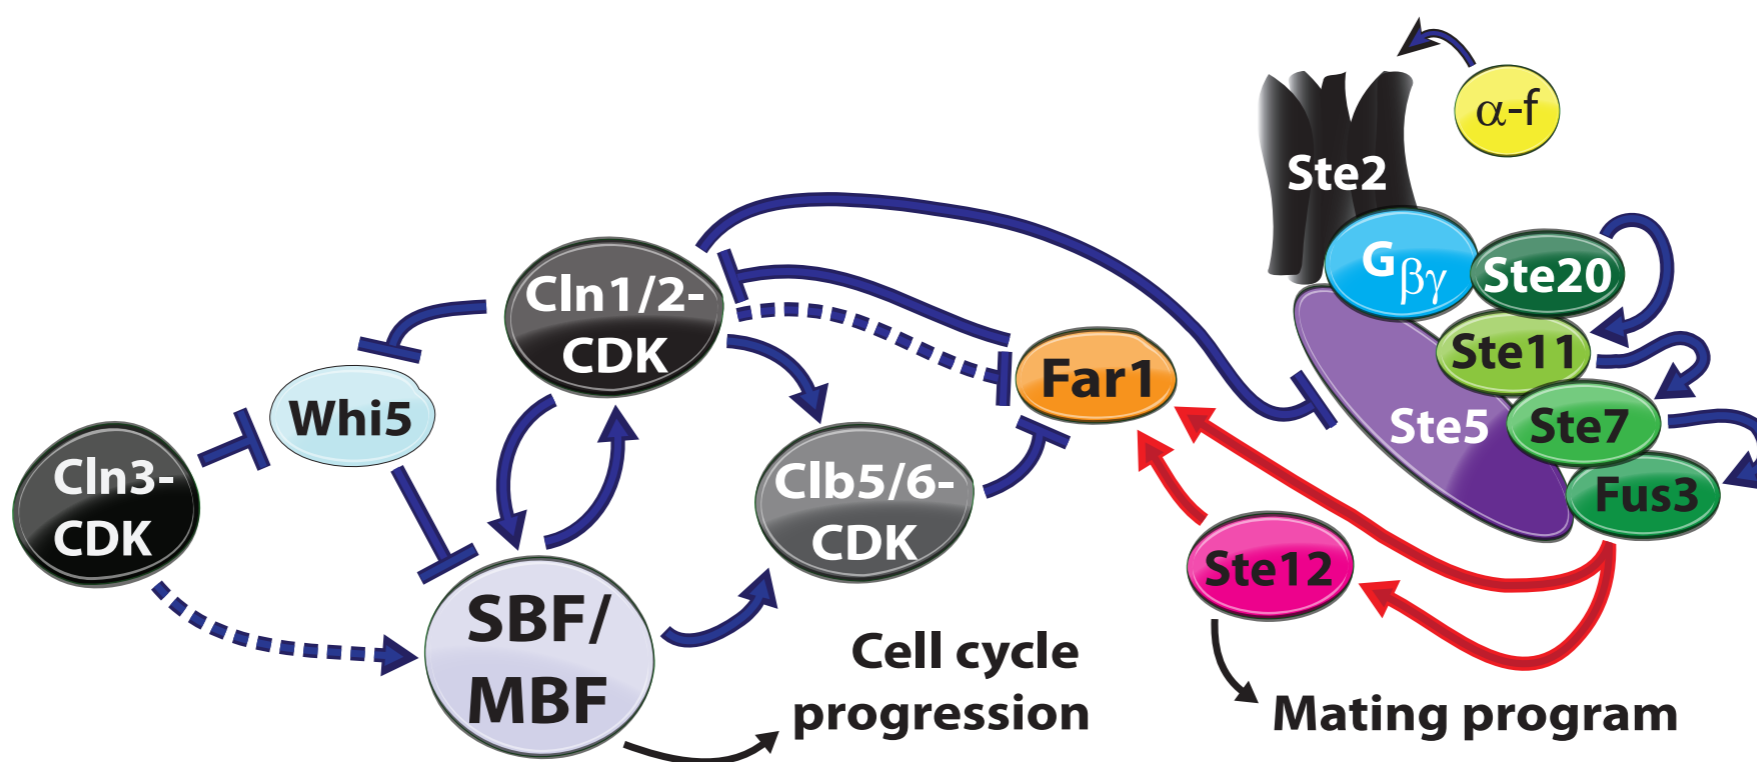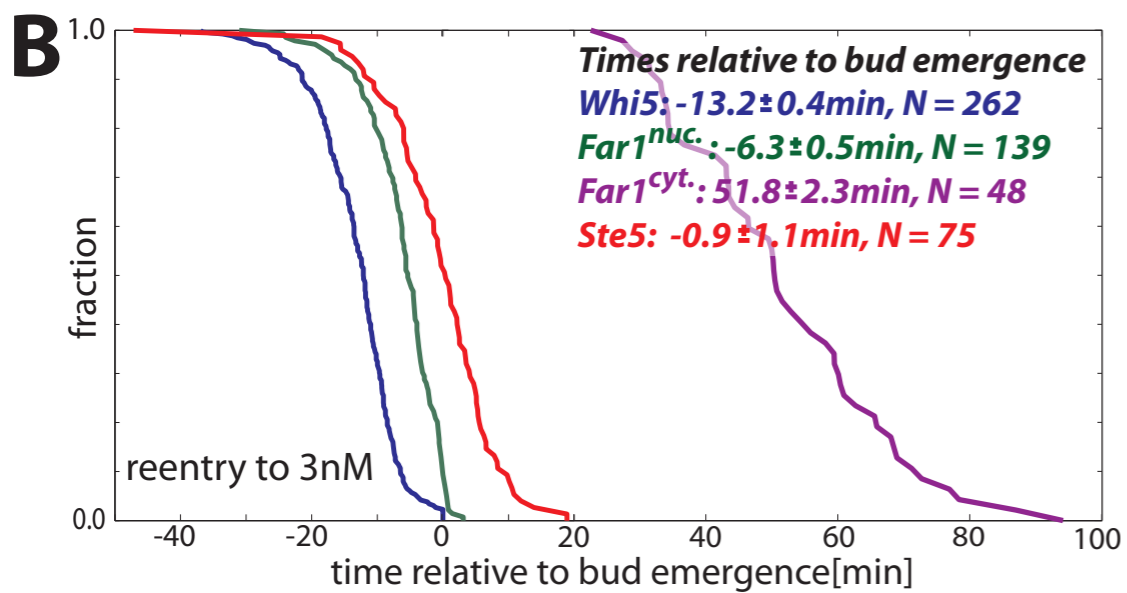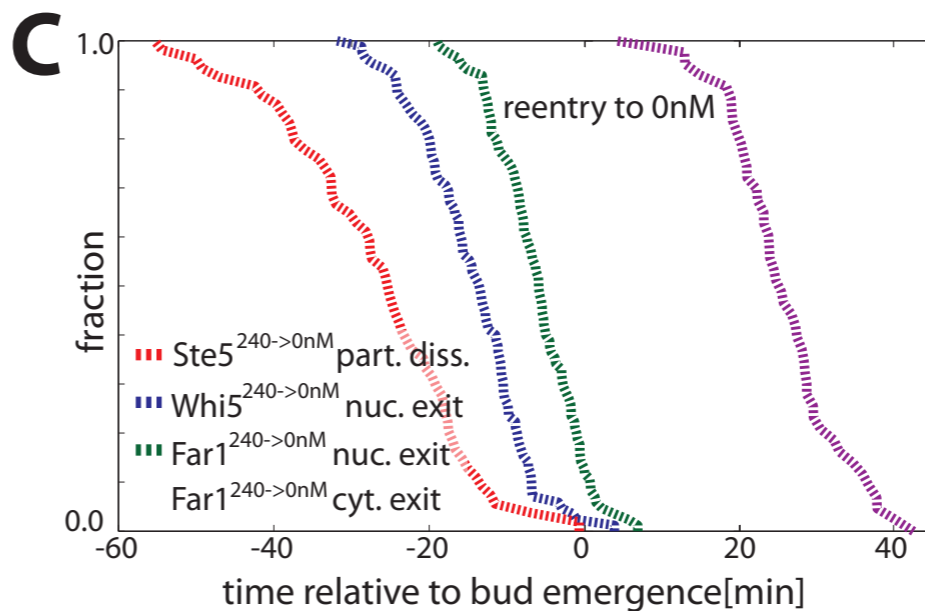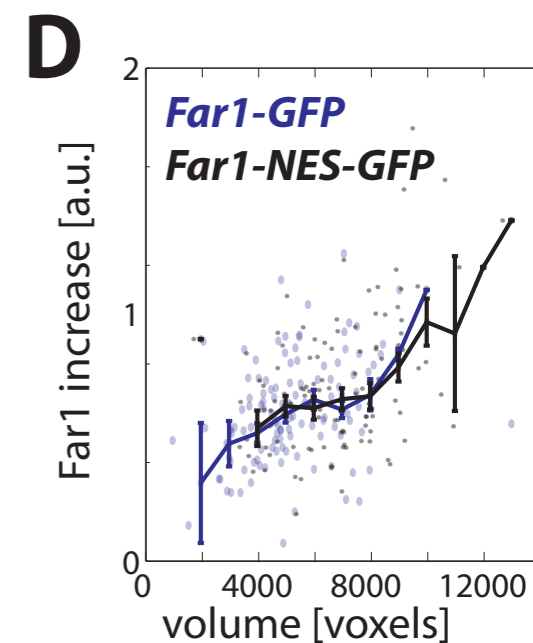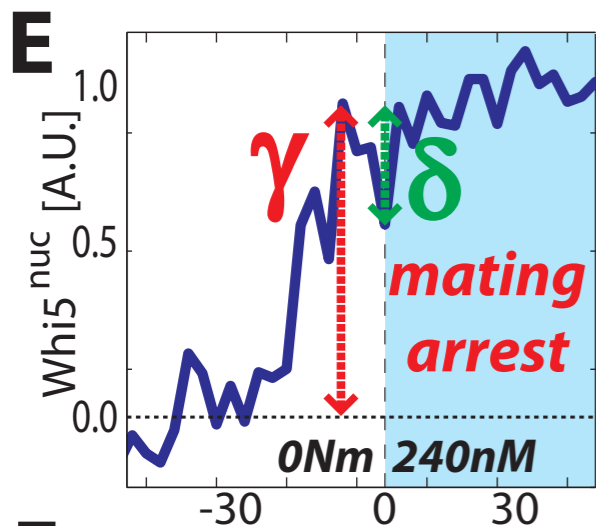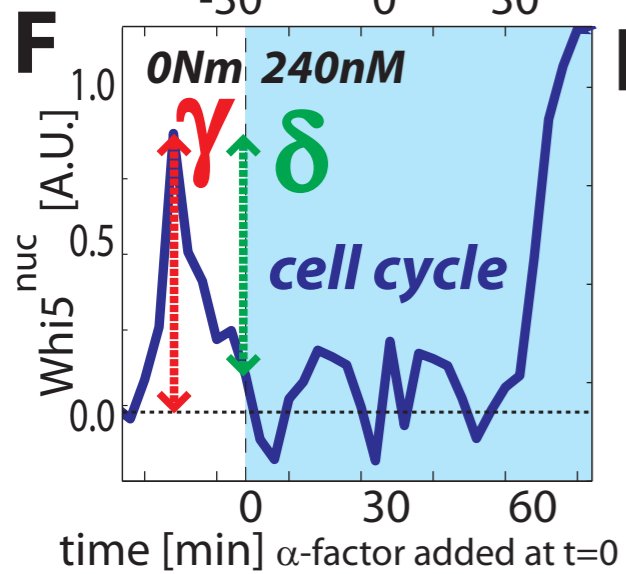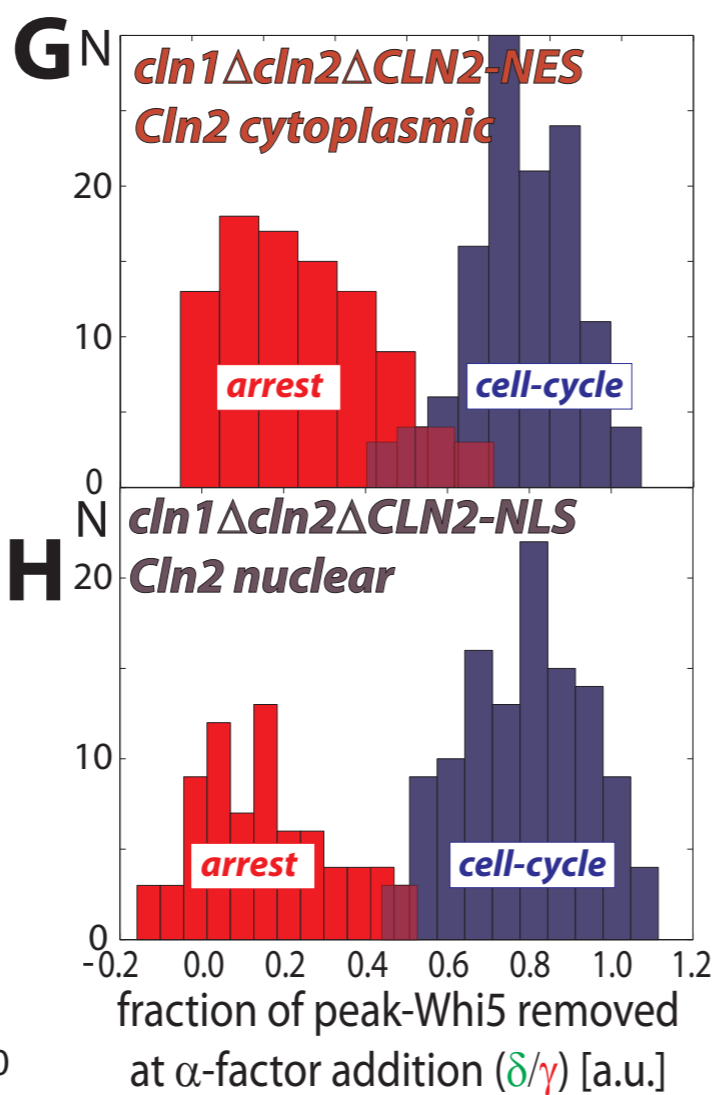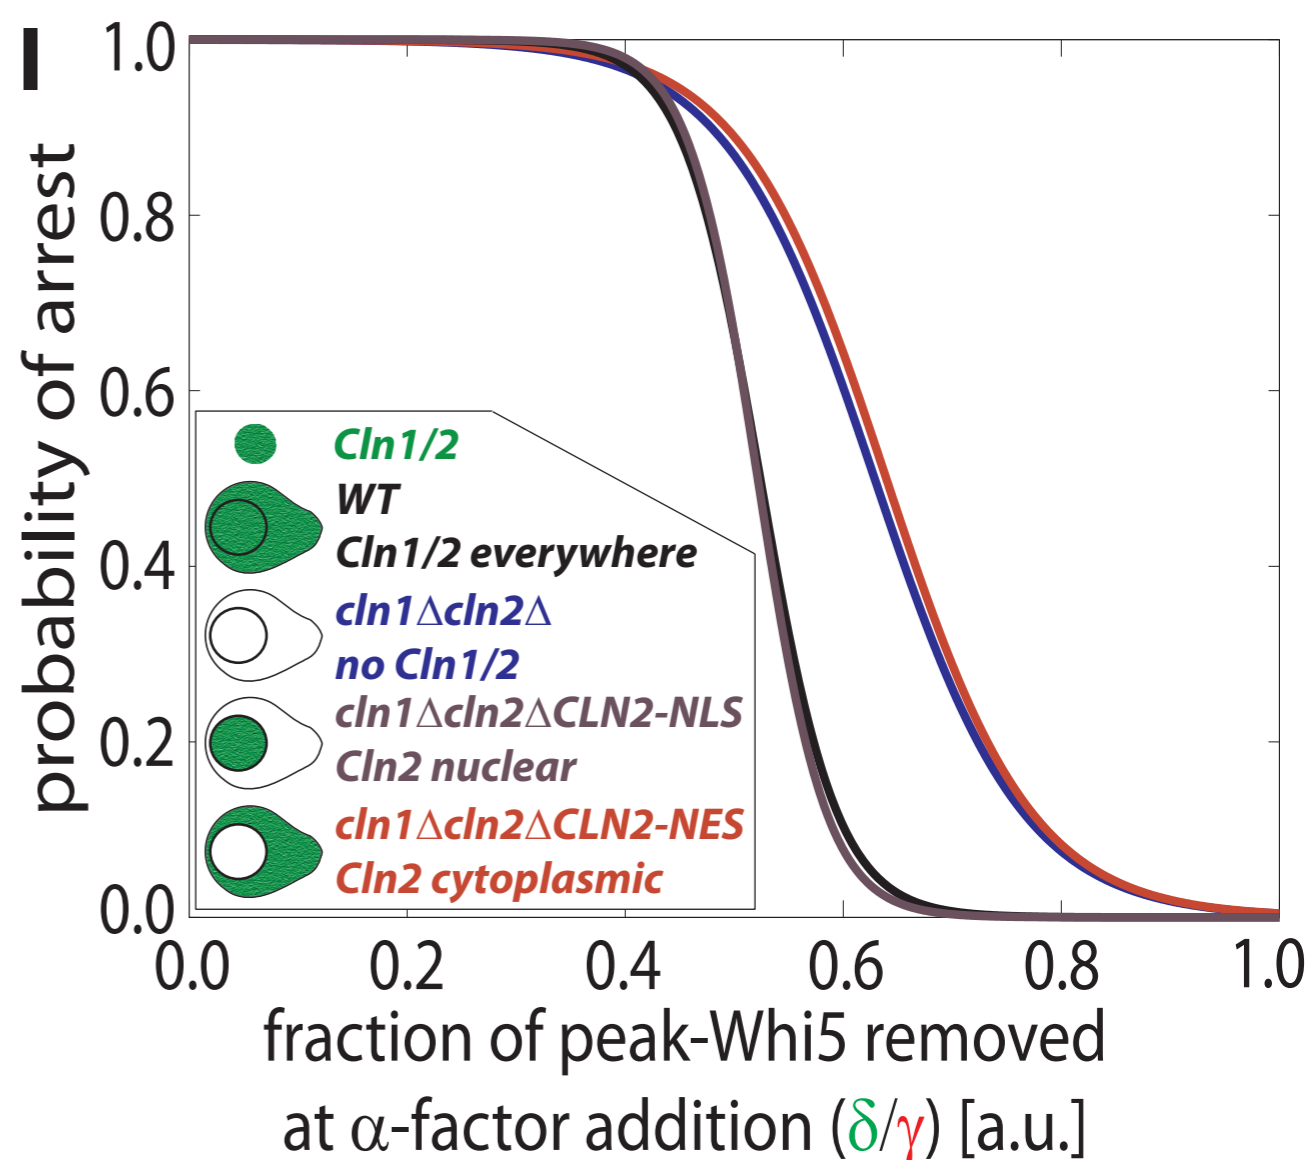

Supplement: NIHMS666519-supplement-1.pdf [file NIHMS666519-supplement-1.pdf]

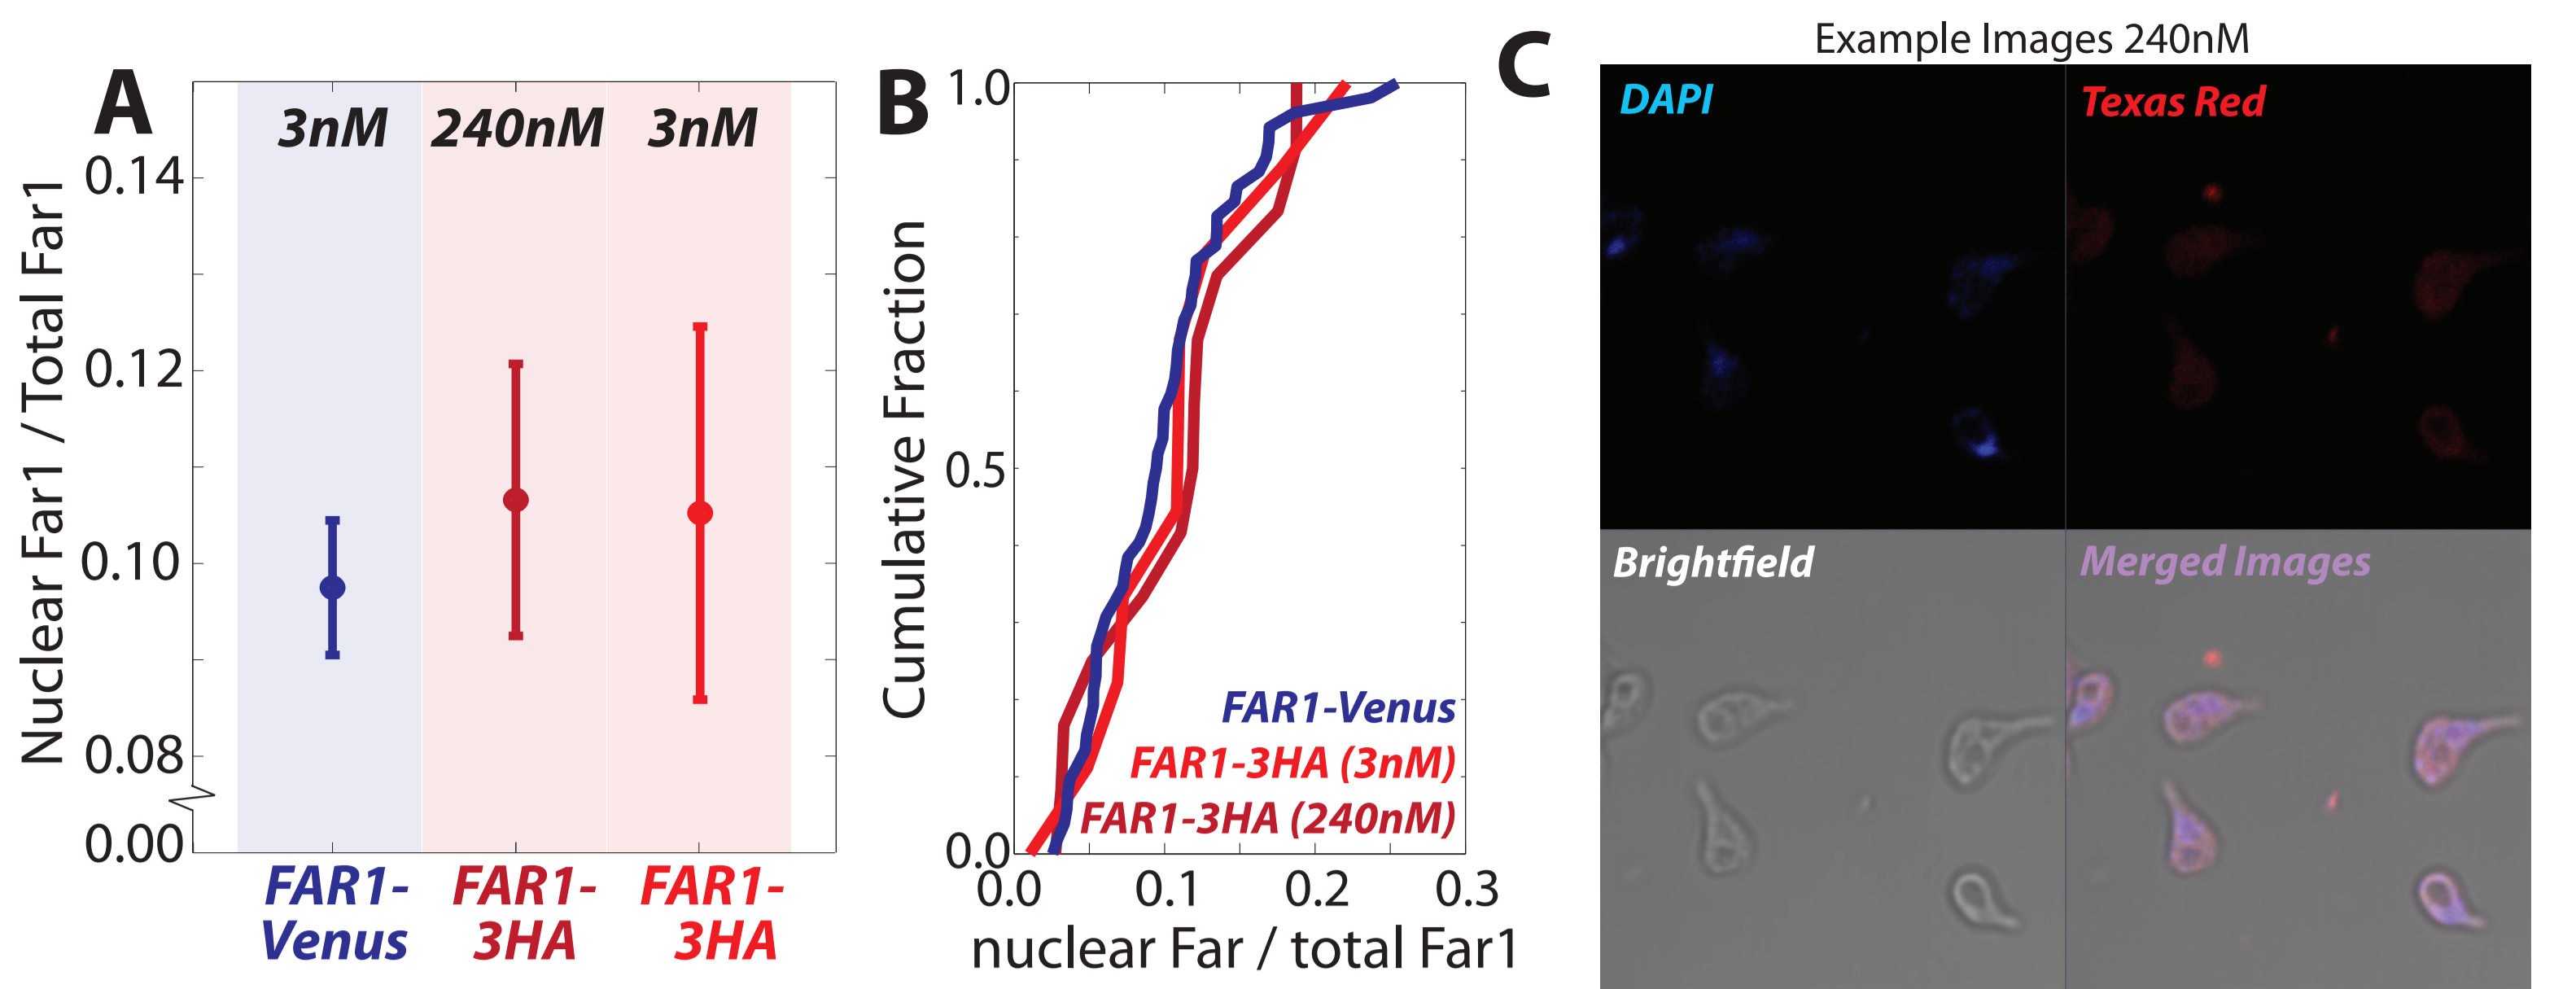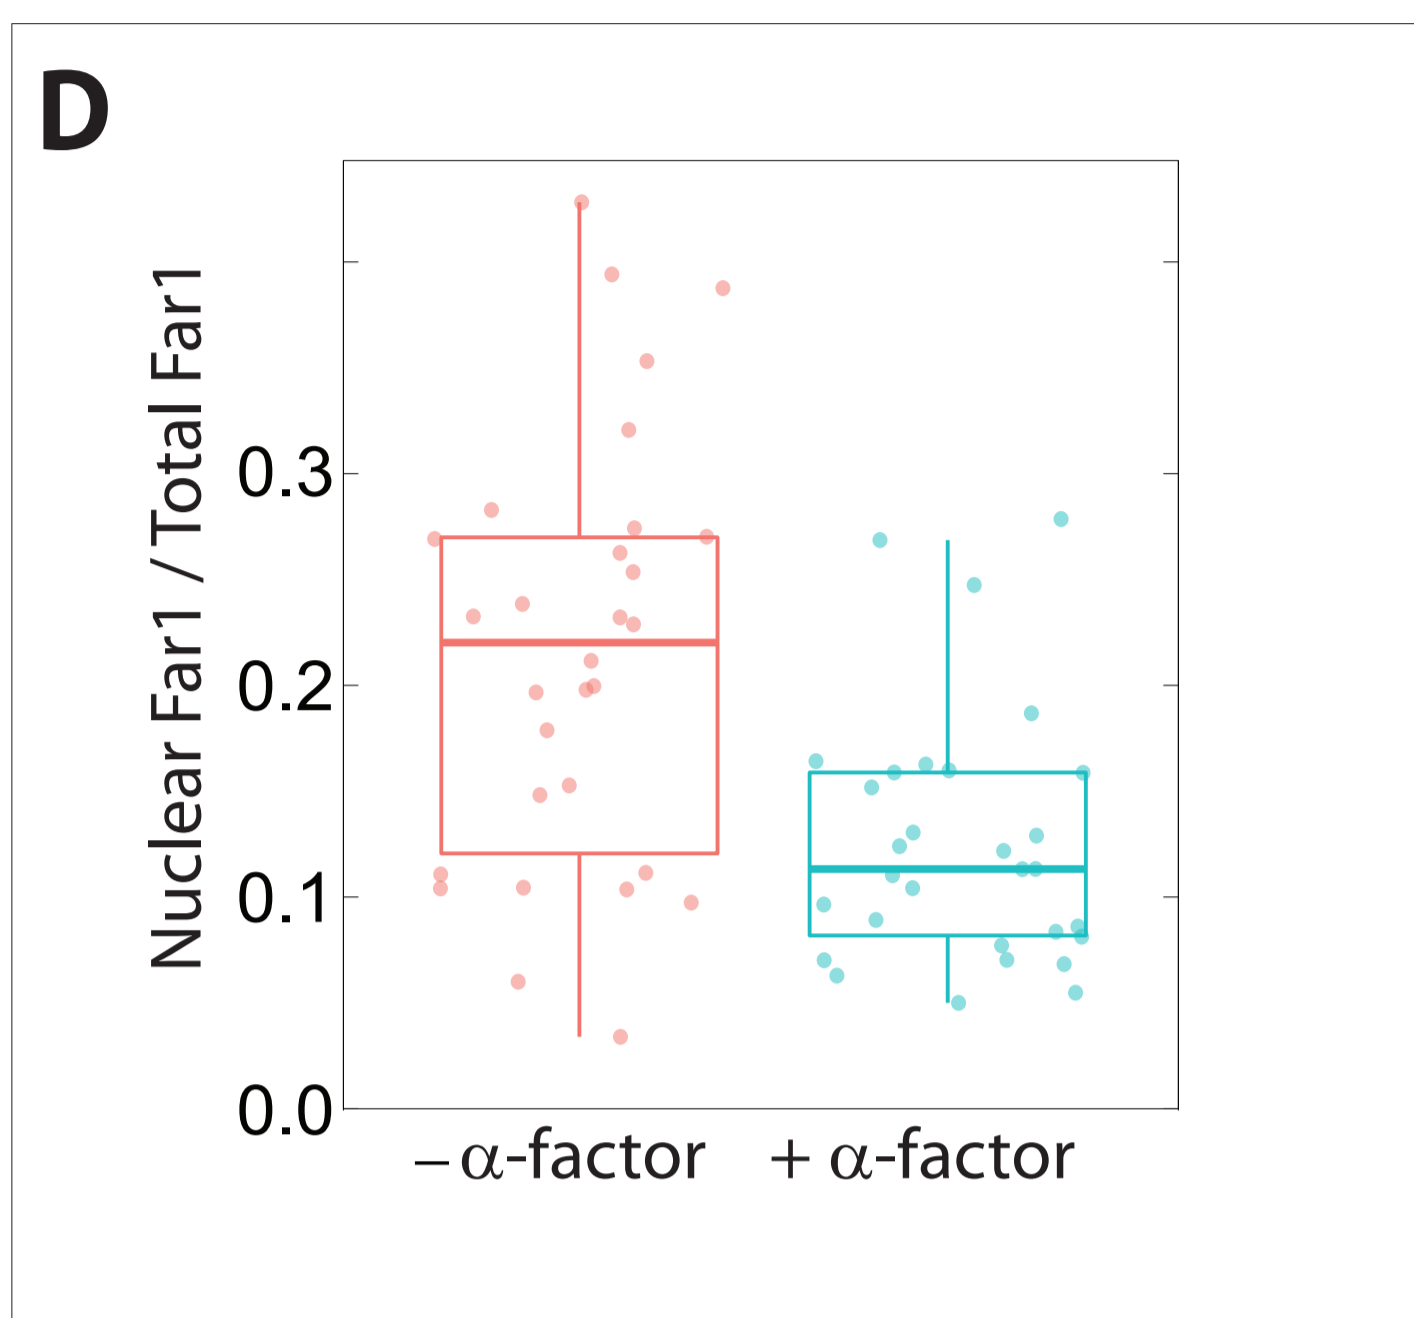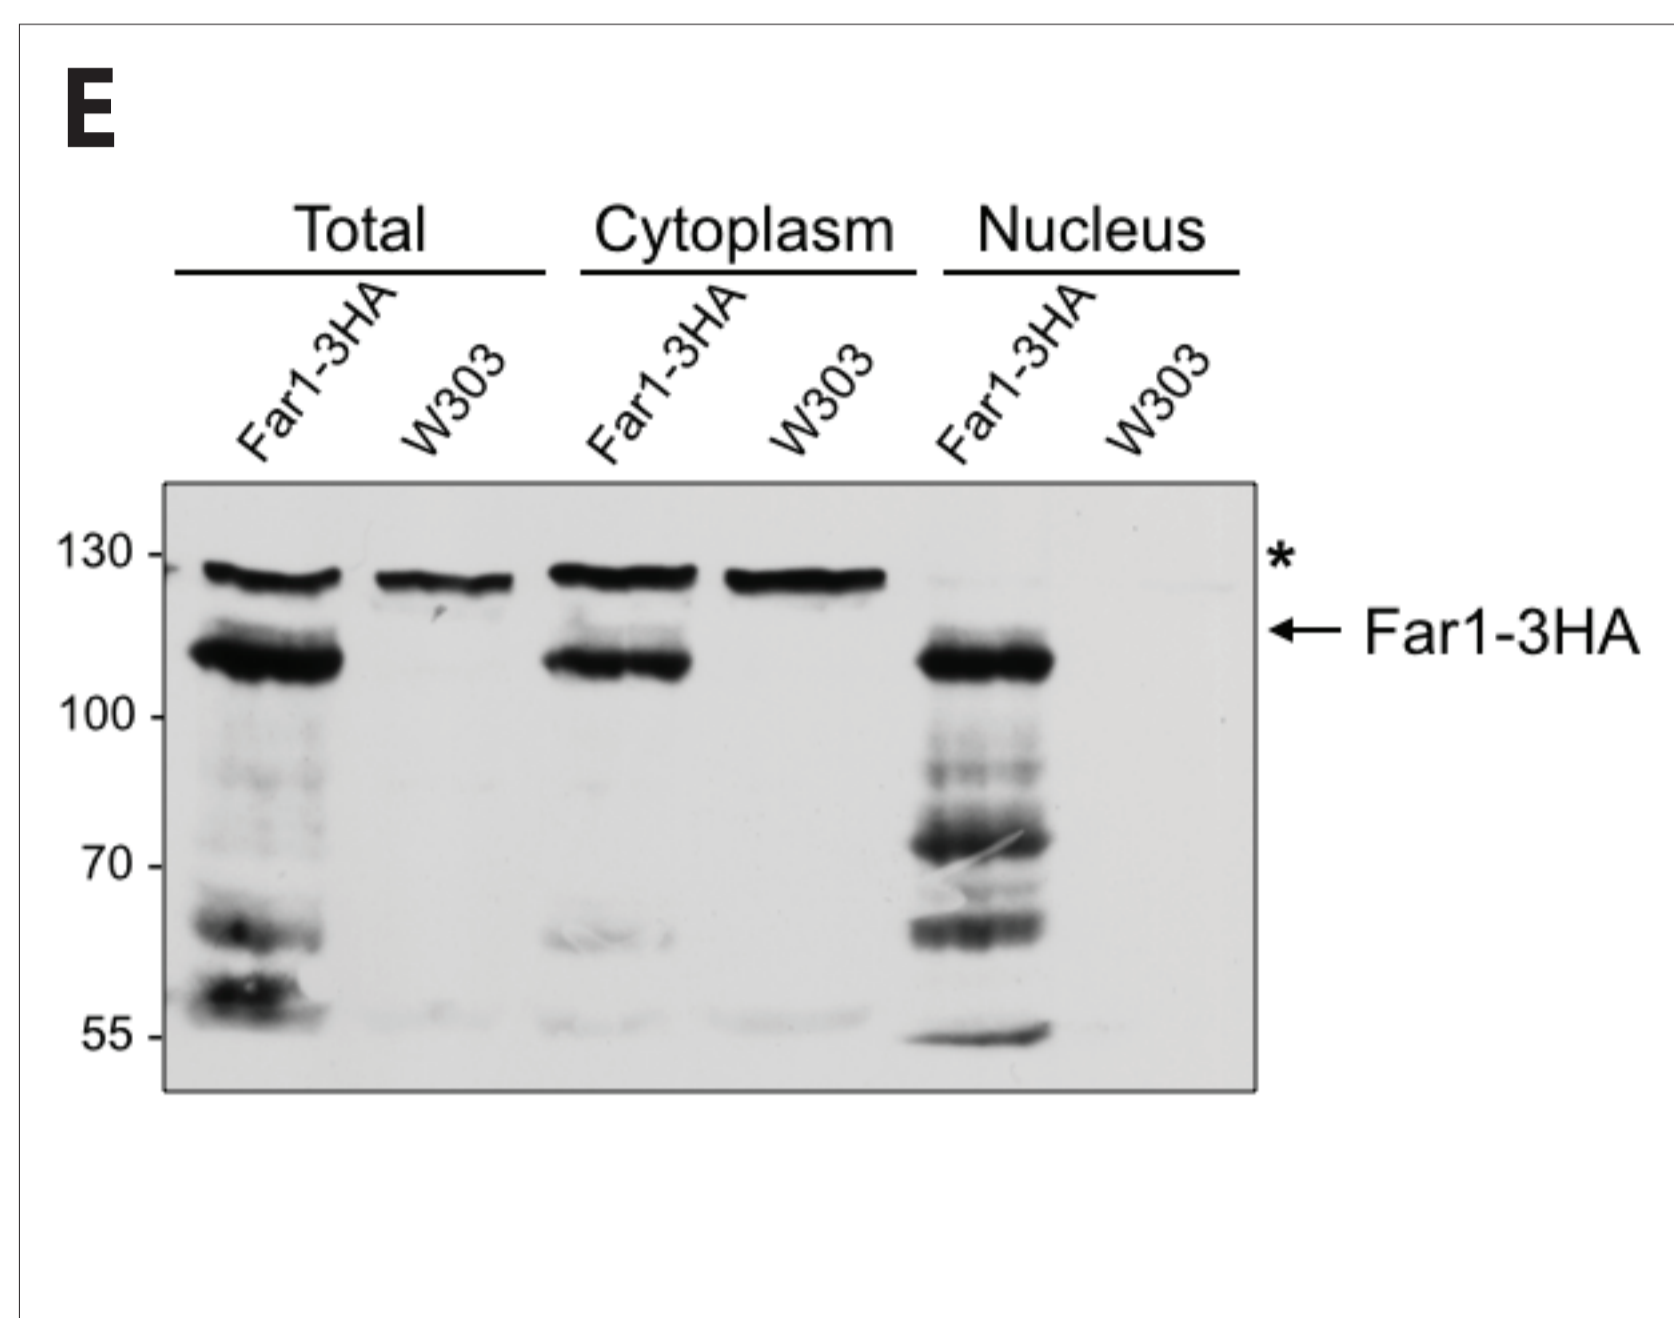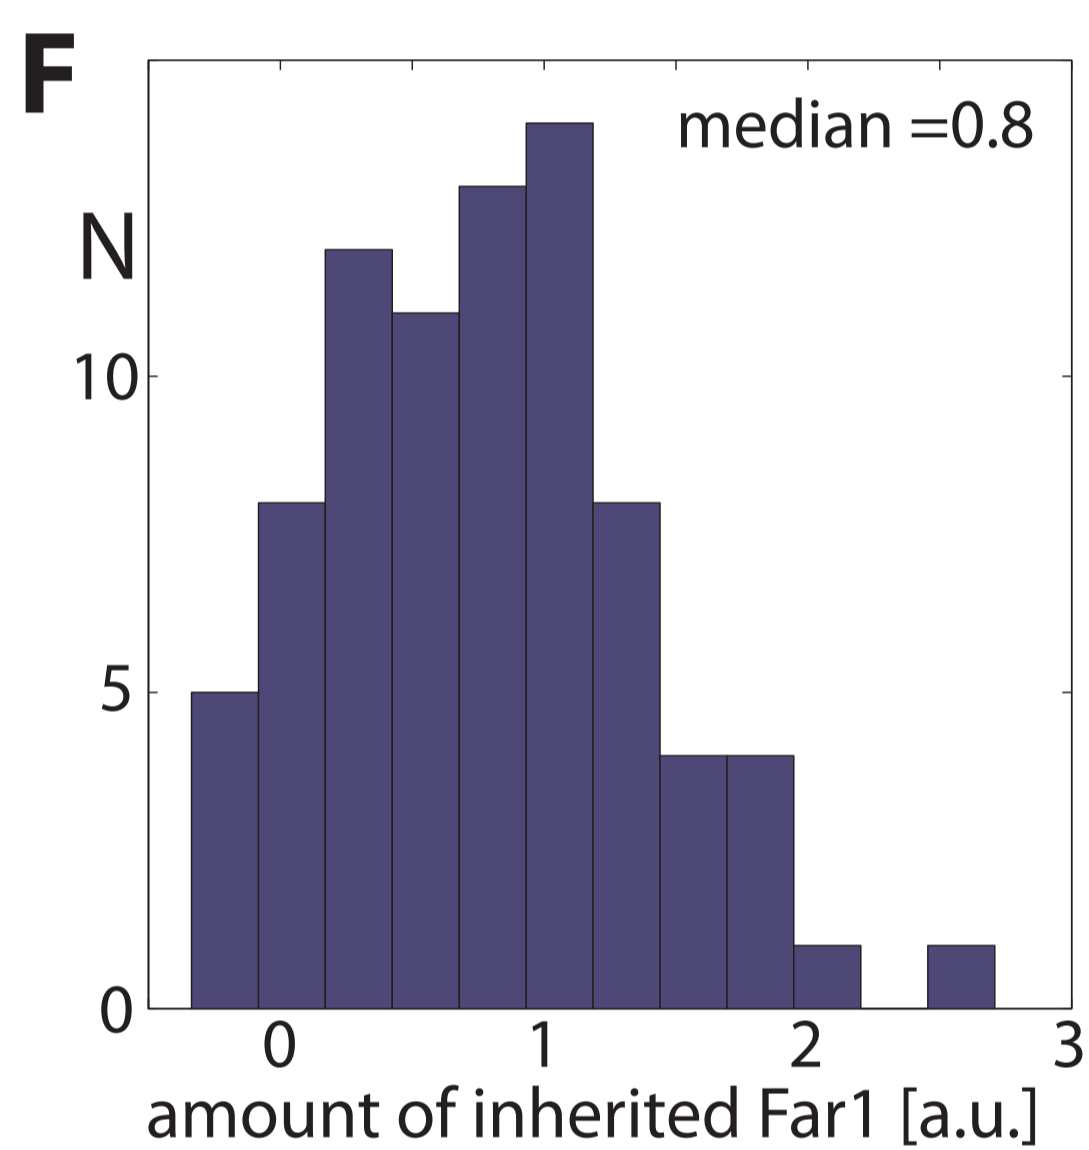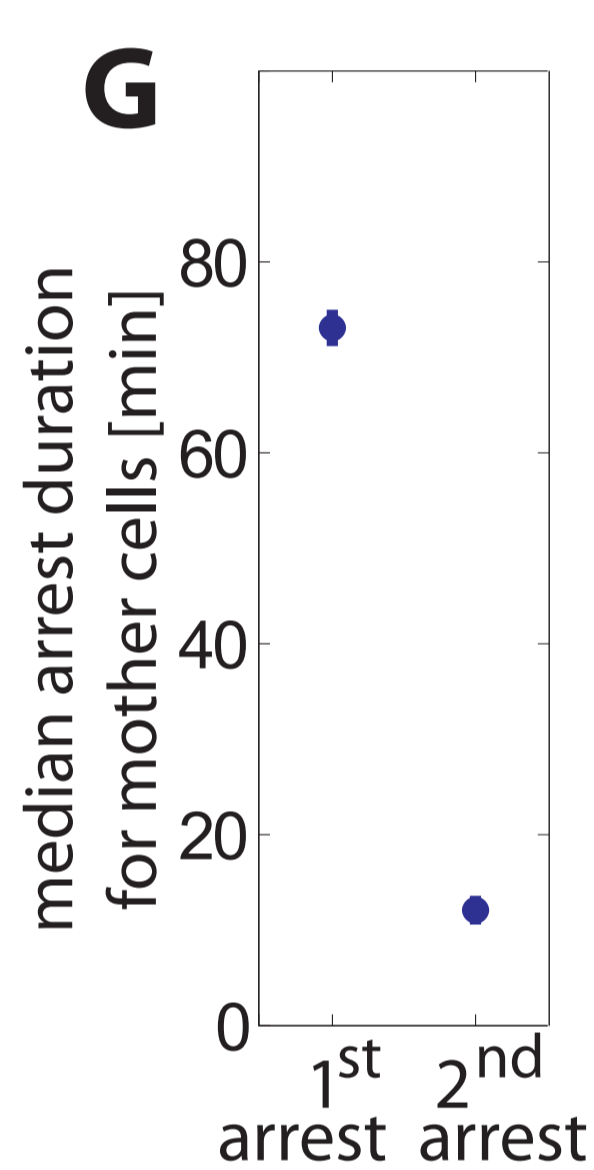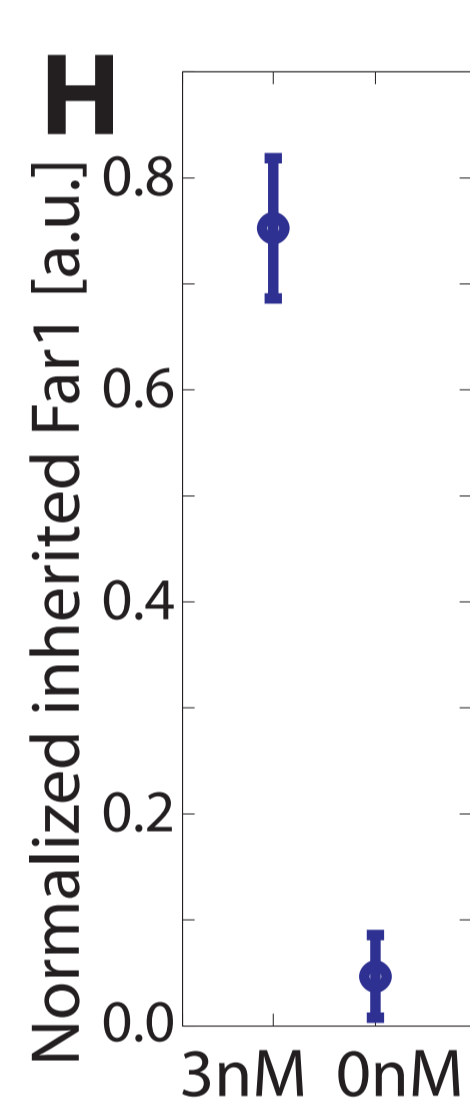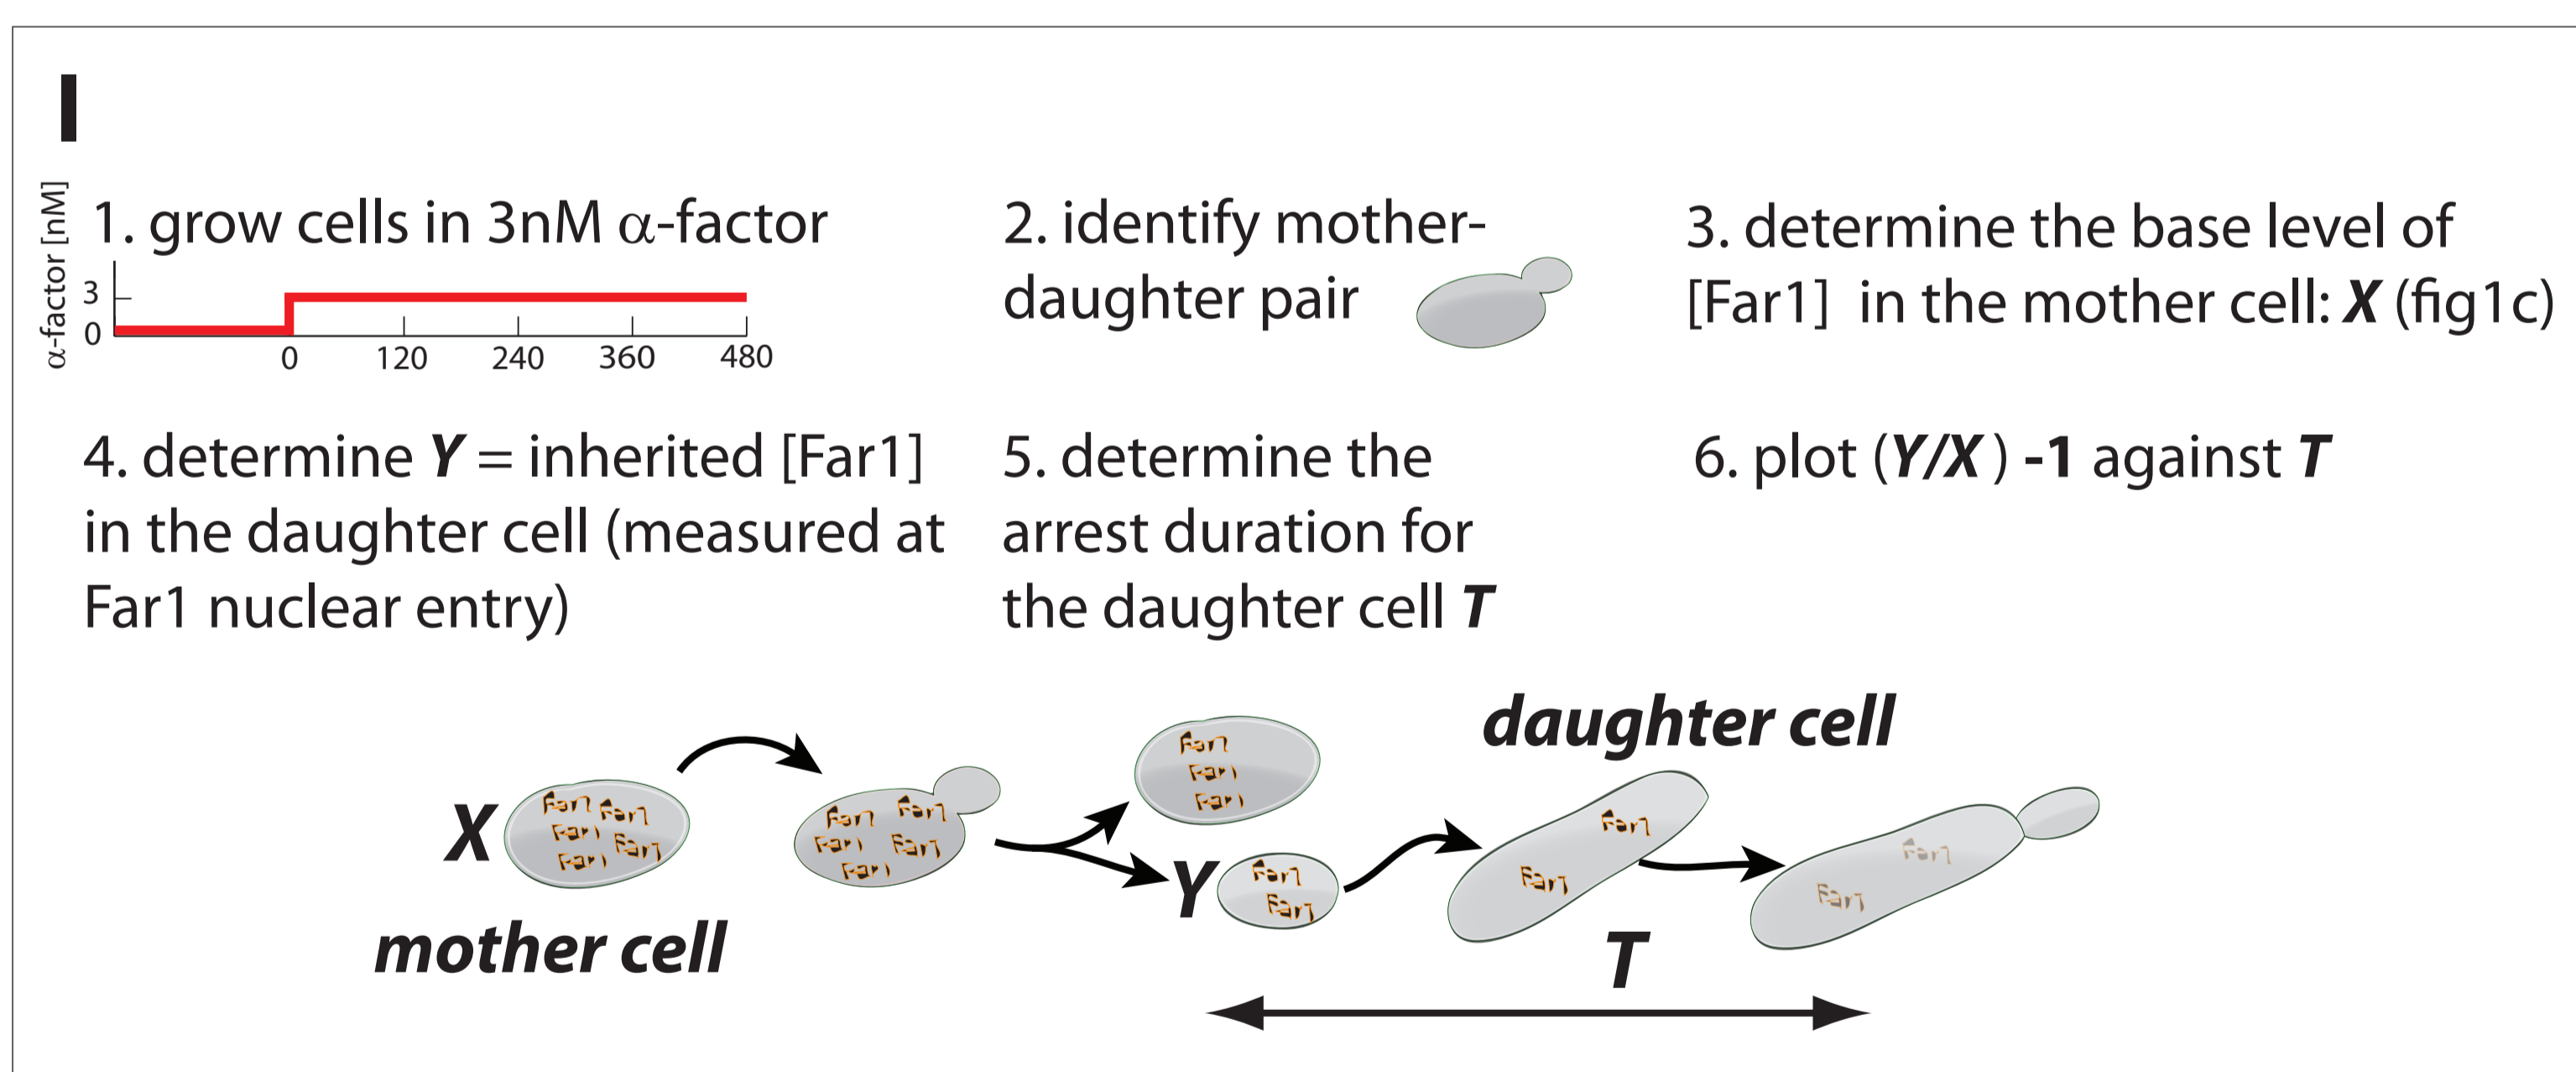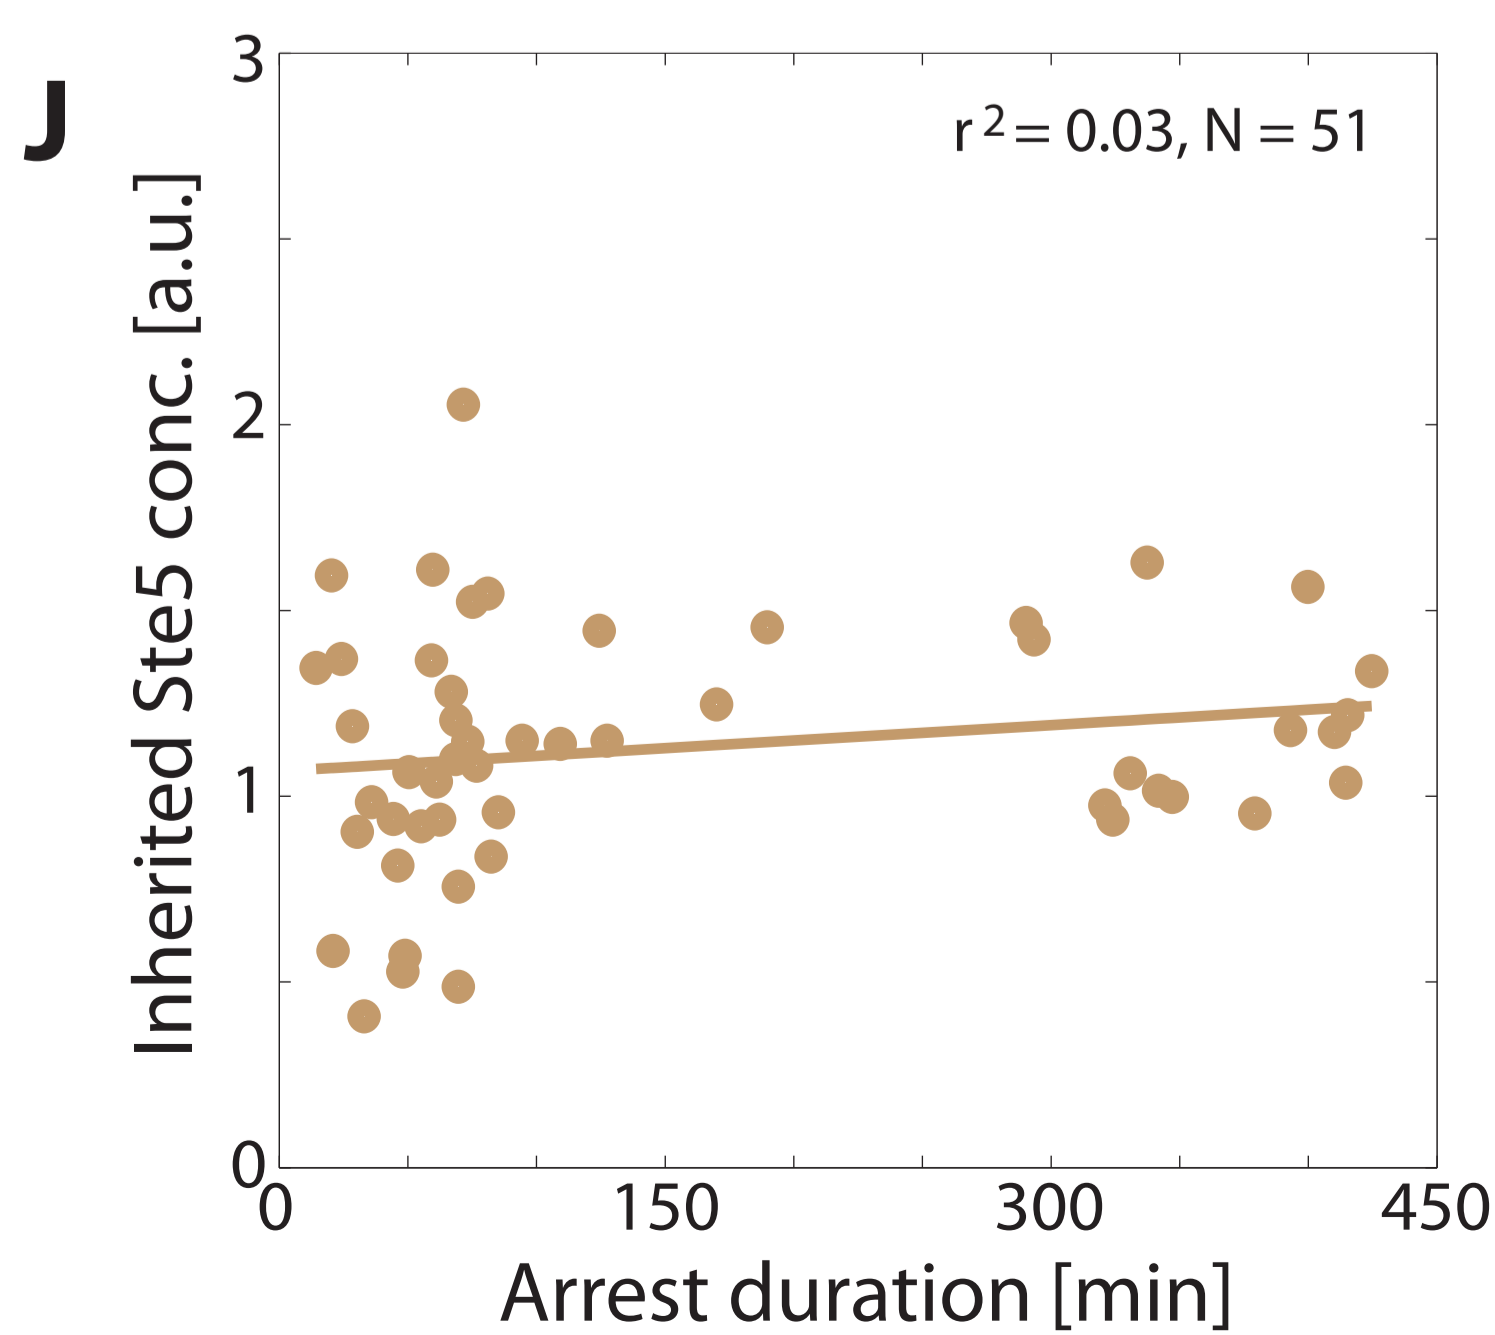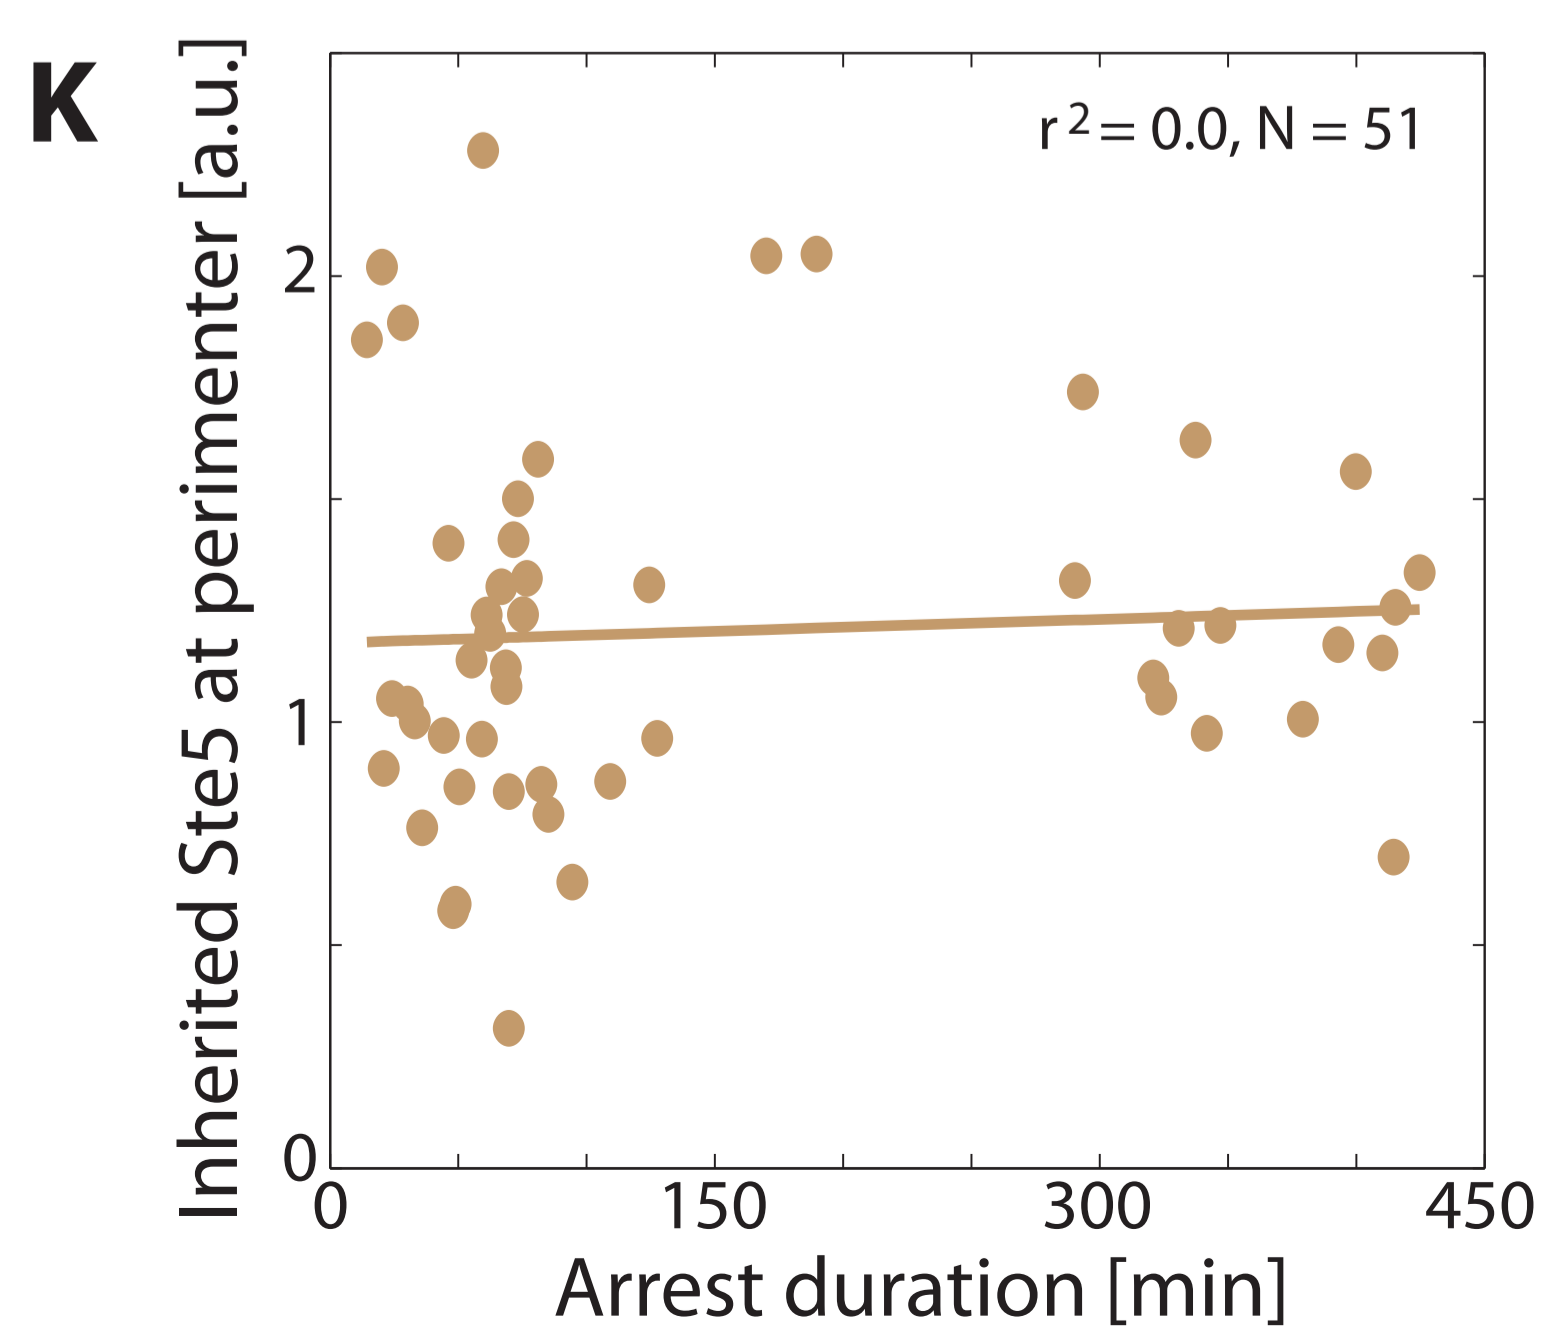

Supplement: NIHMS666519-supplement-2.pdf [file NIHMS666519-supplement-2.pdf]

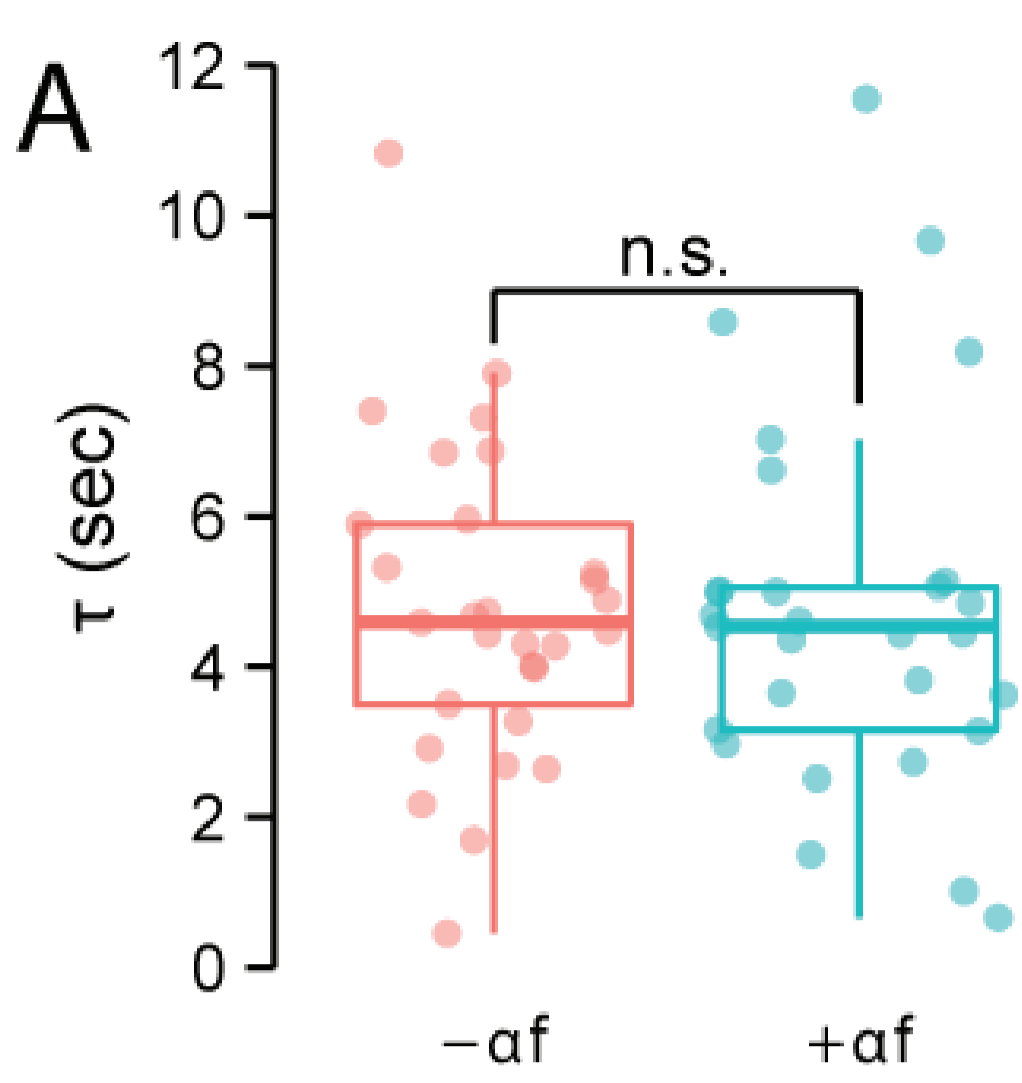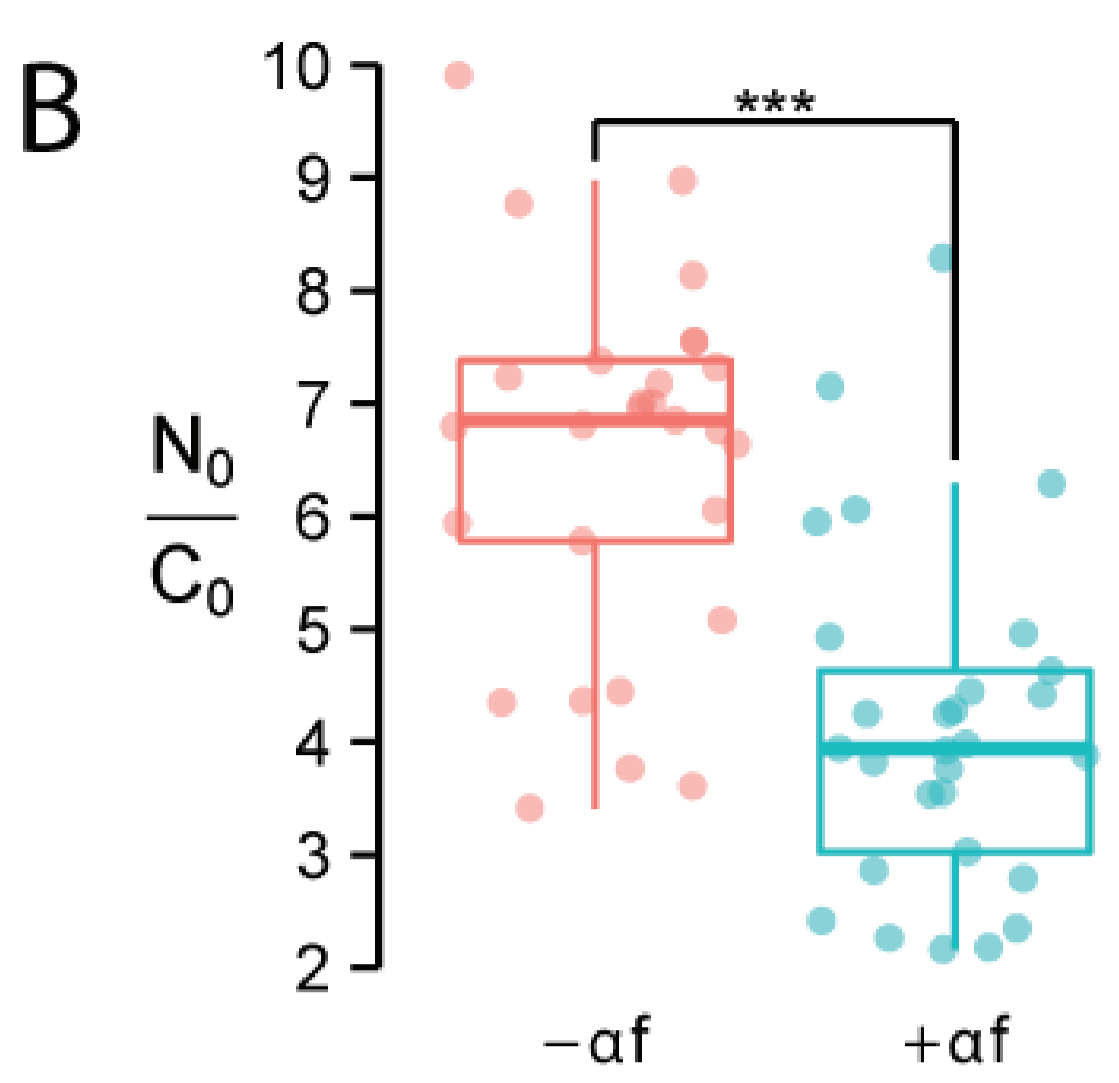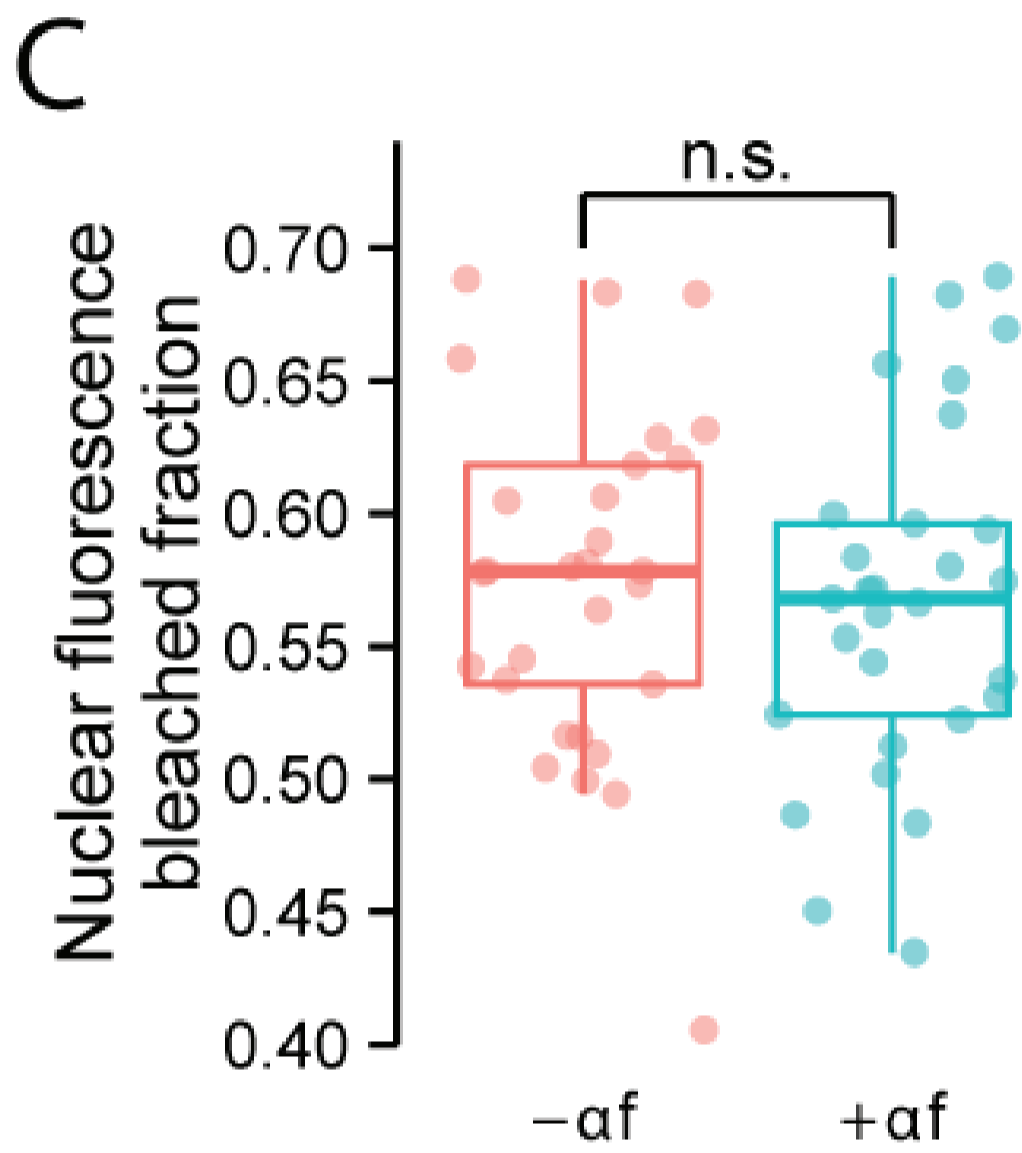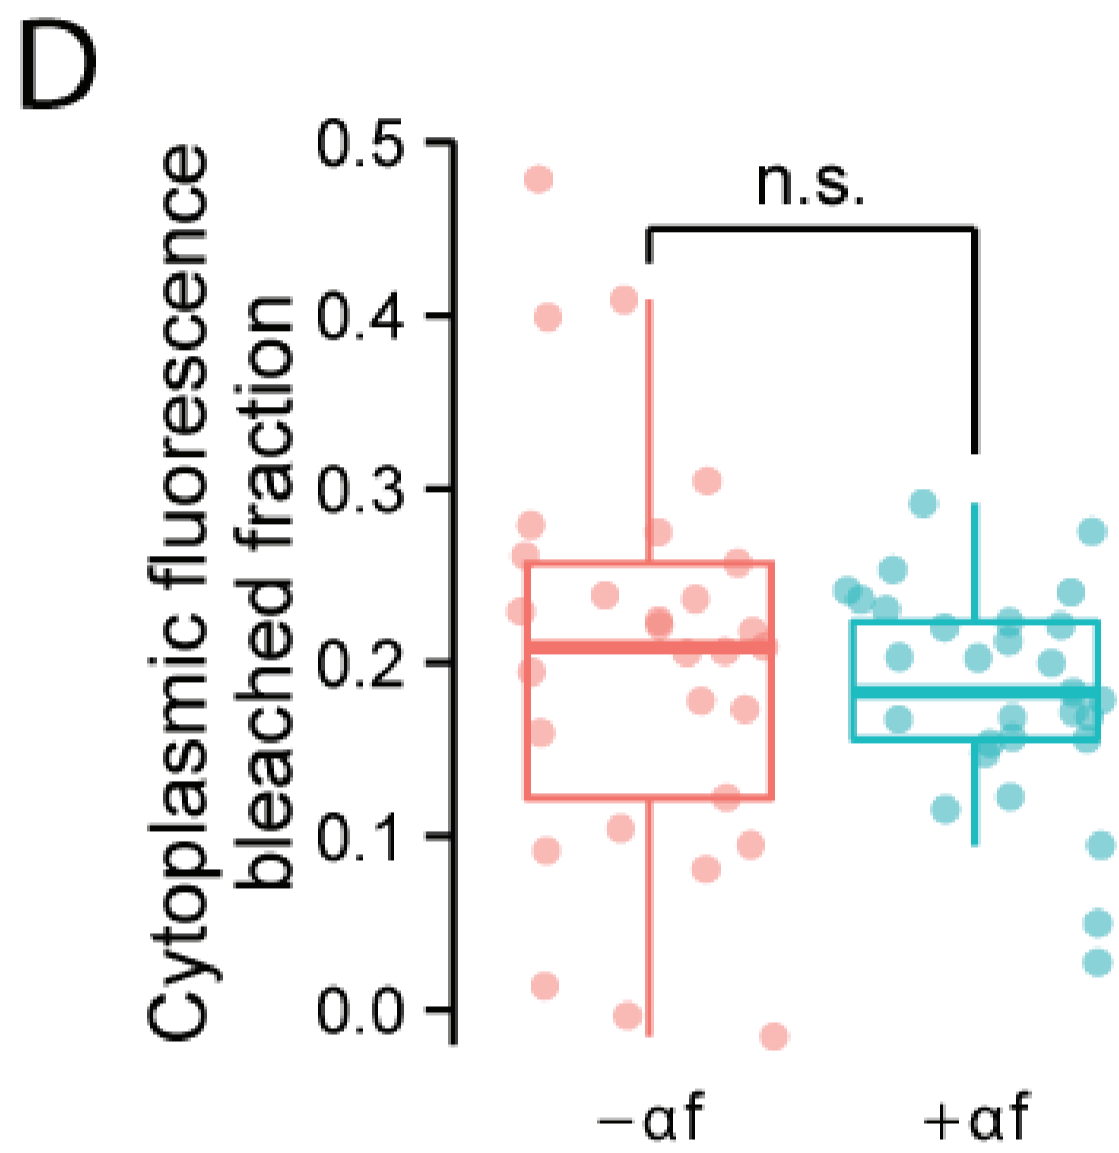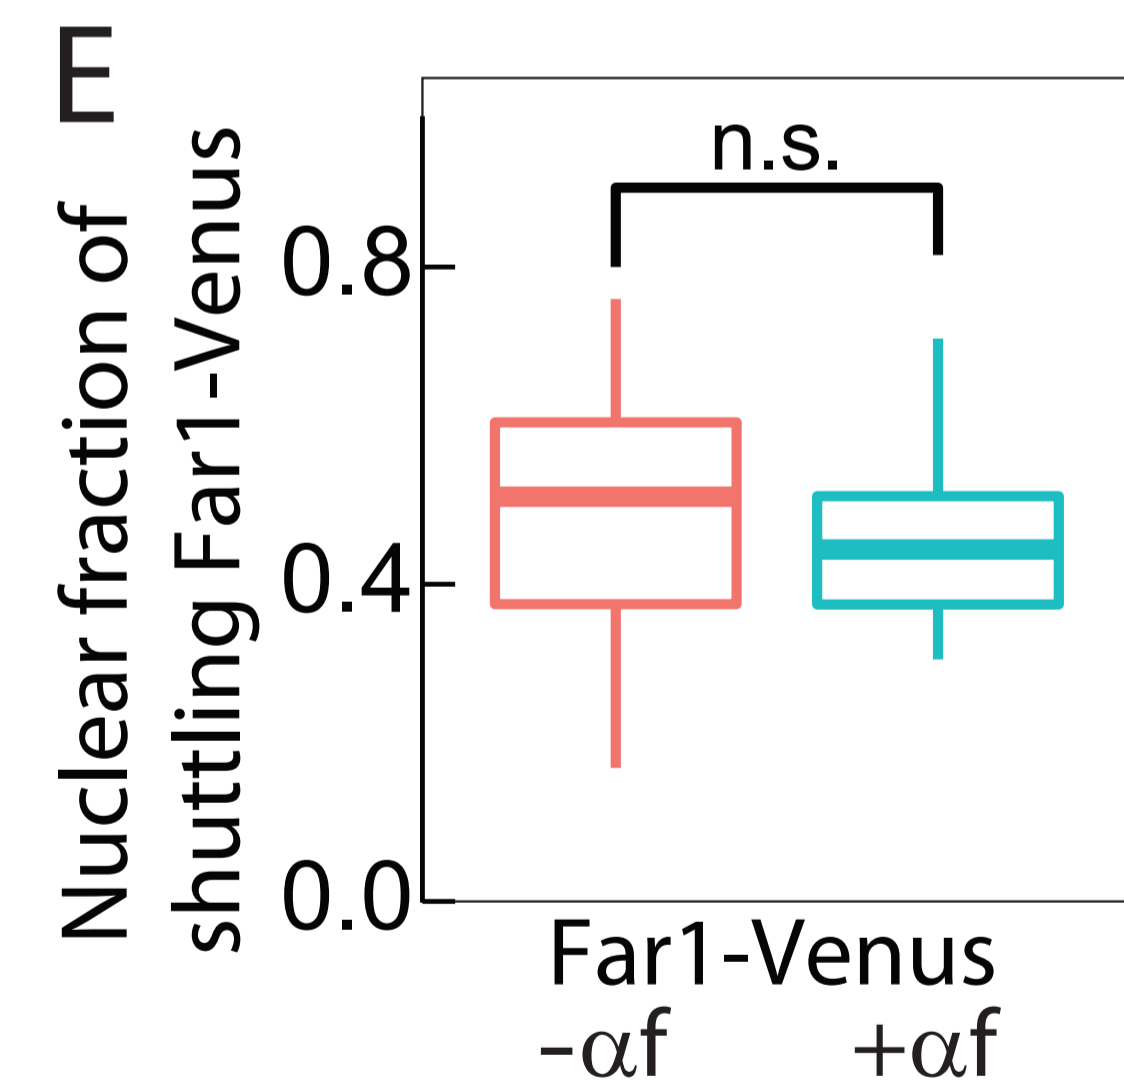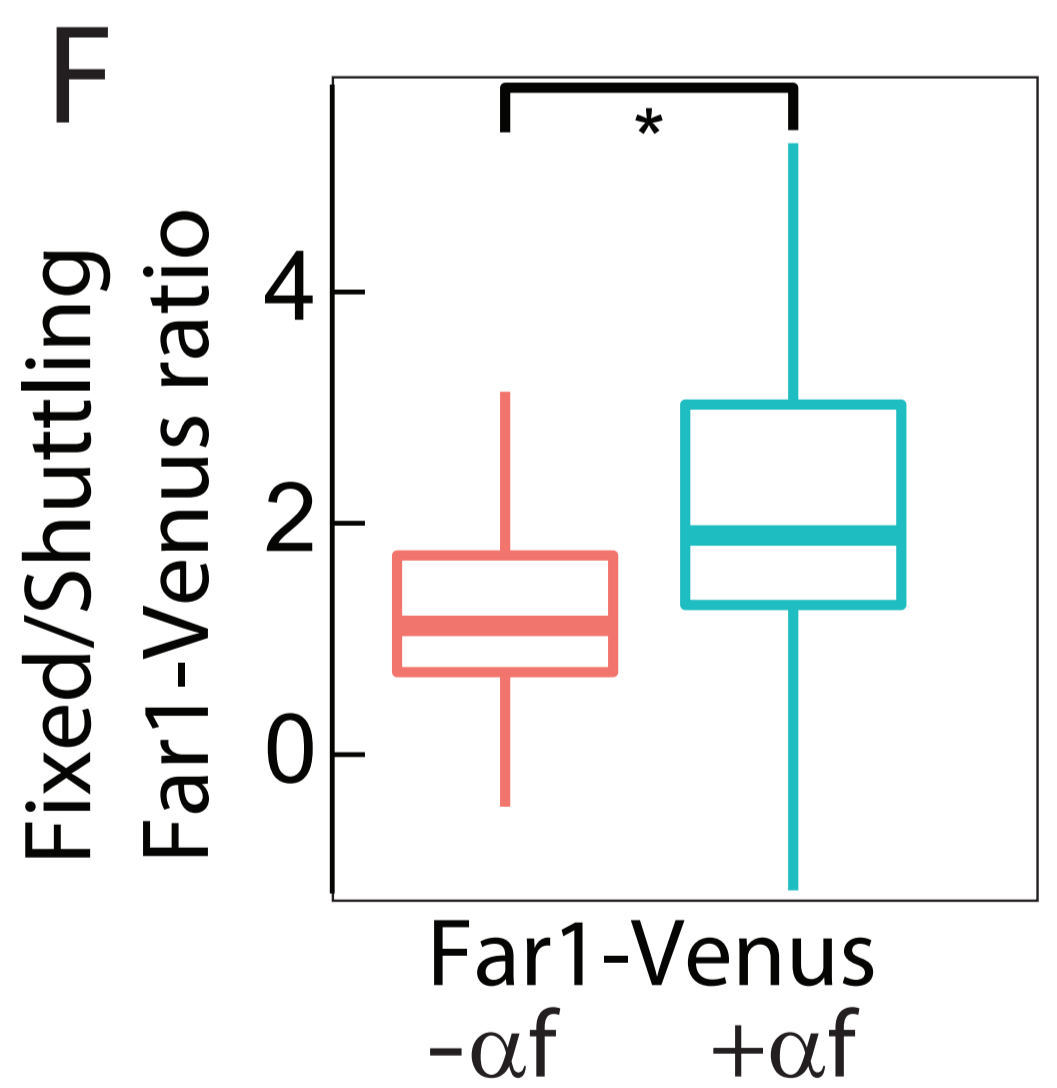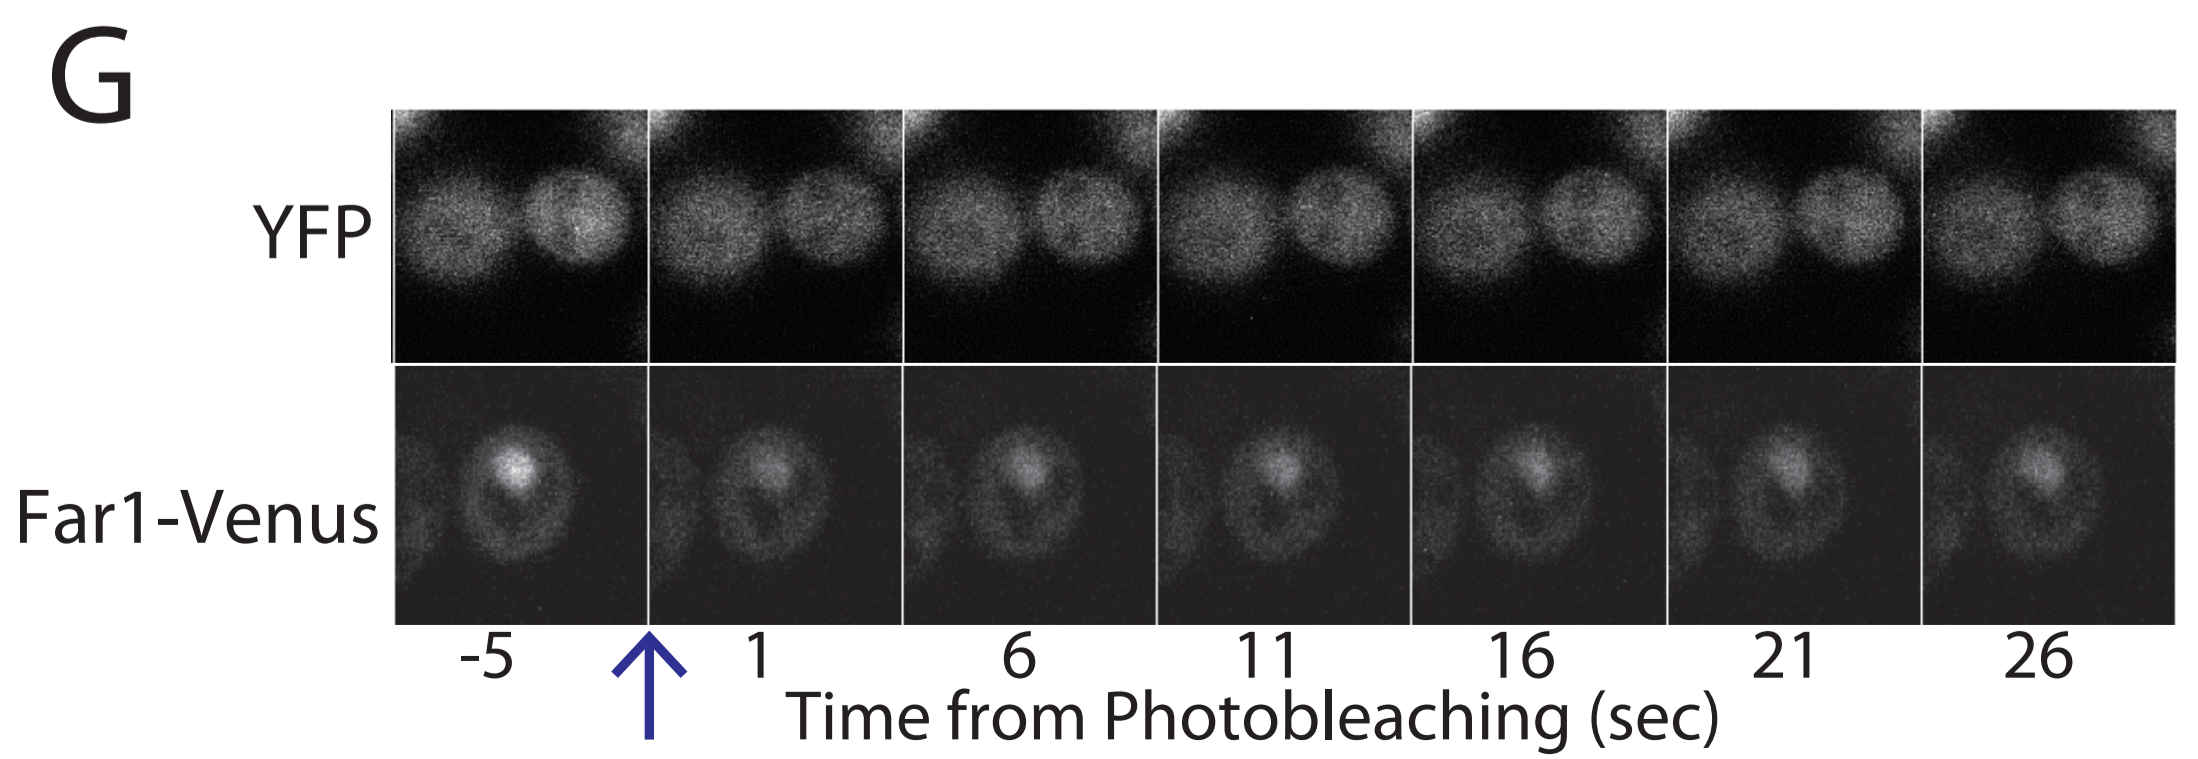

Supplement: NIHMS666519-supplement-3.pdf [file NIHMS666519-supplement-3.pdf]

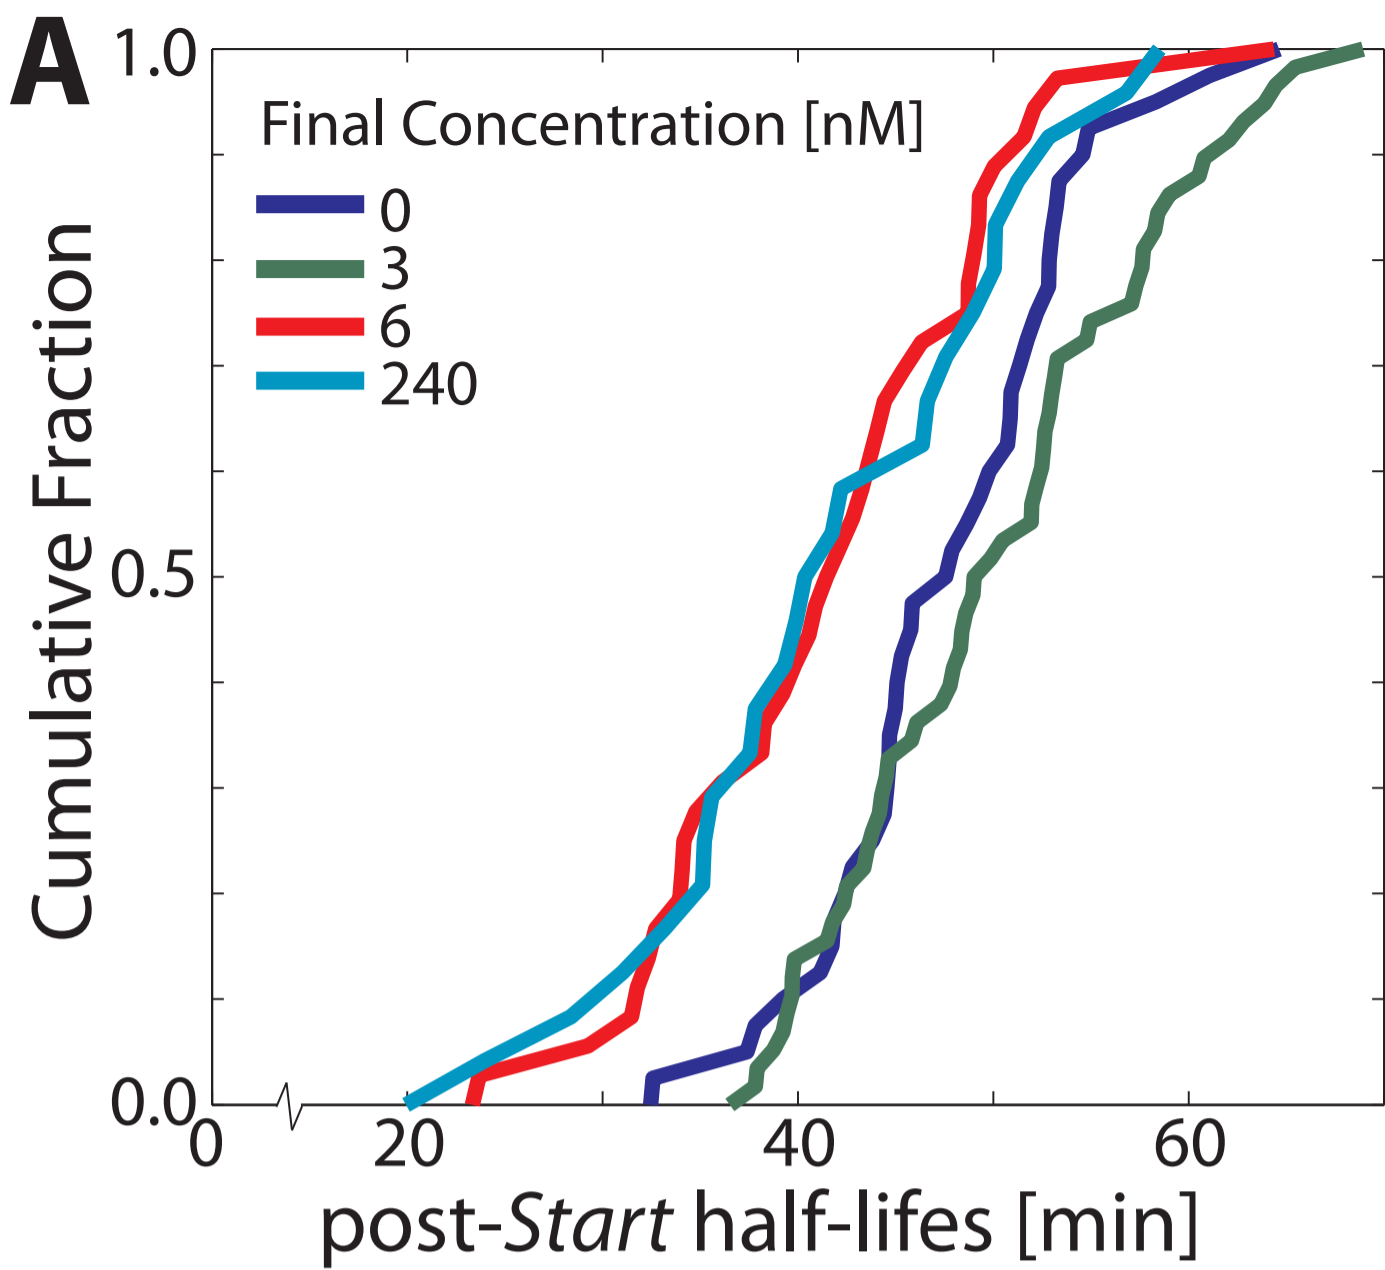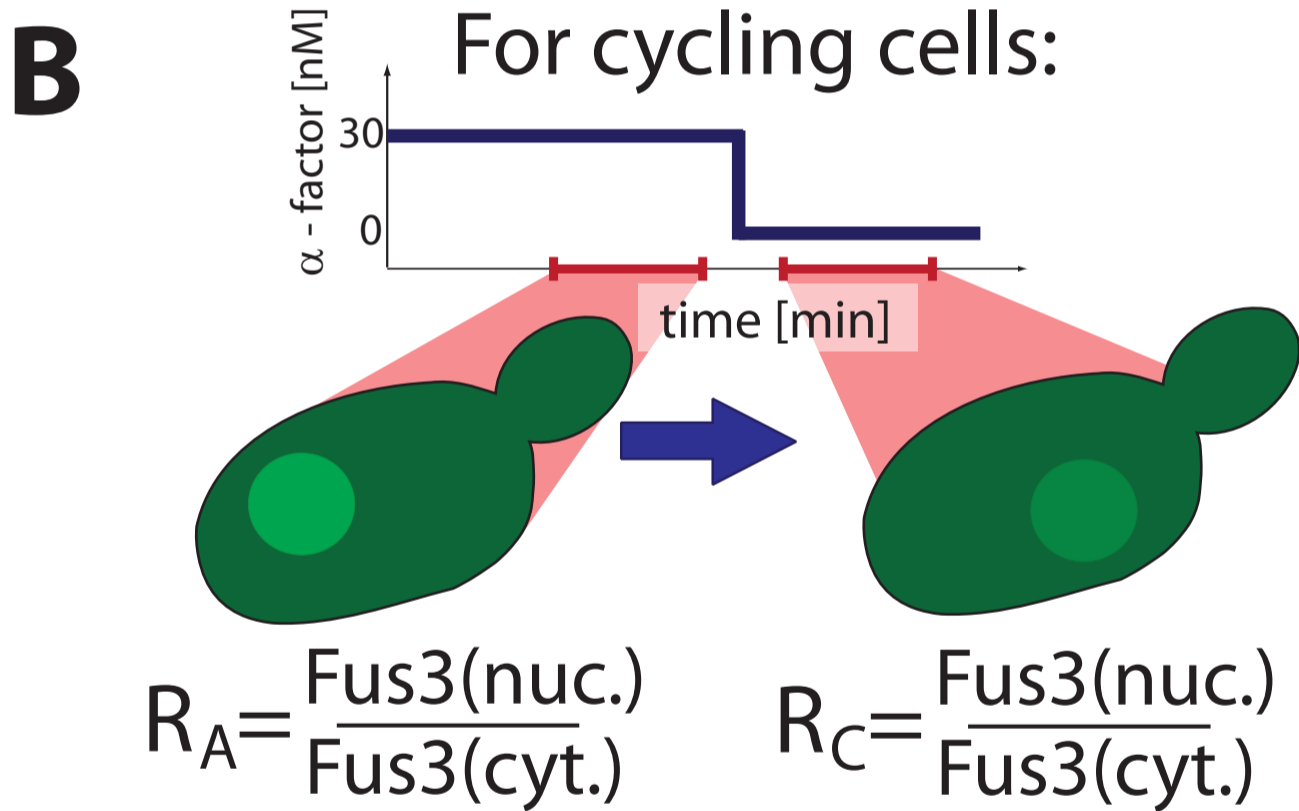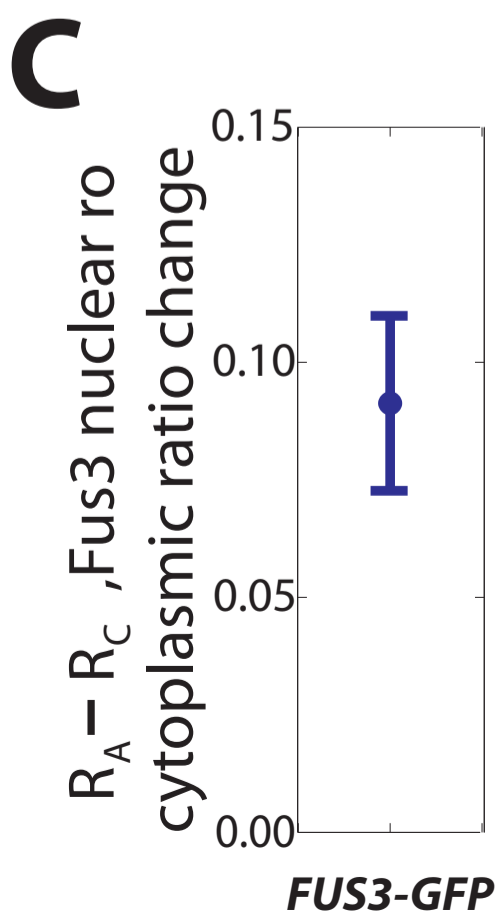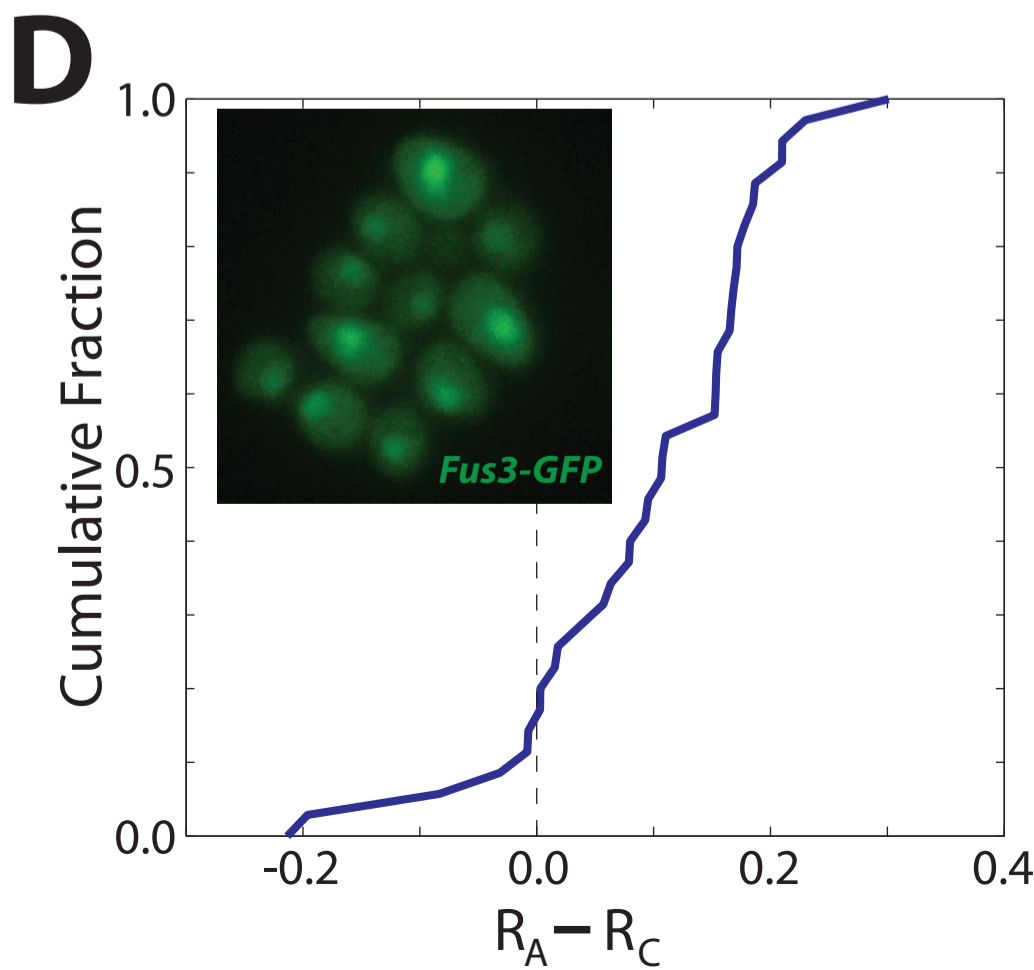

Supplement: NIHMS666519-supplement-4.pdf [file NIHMS666519-supplement-4.pdf]

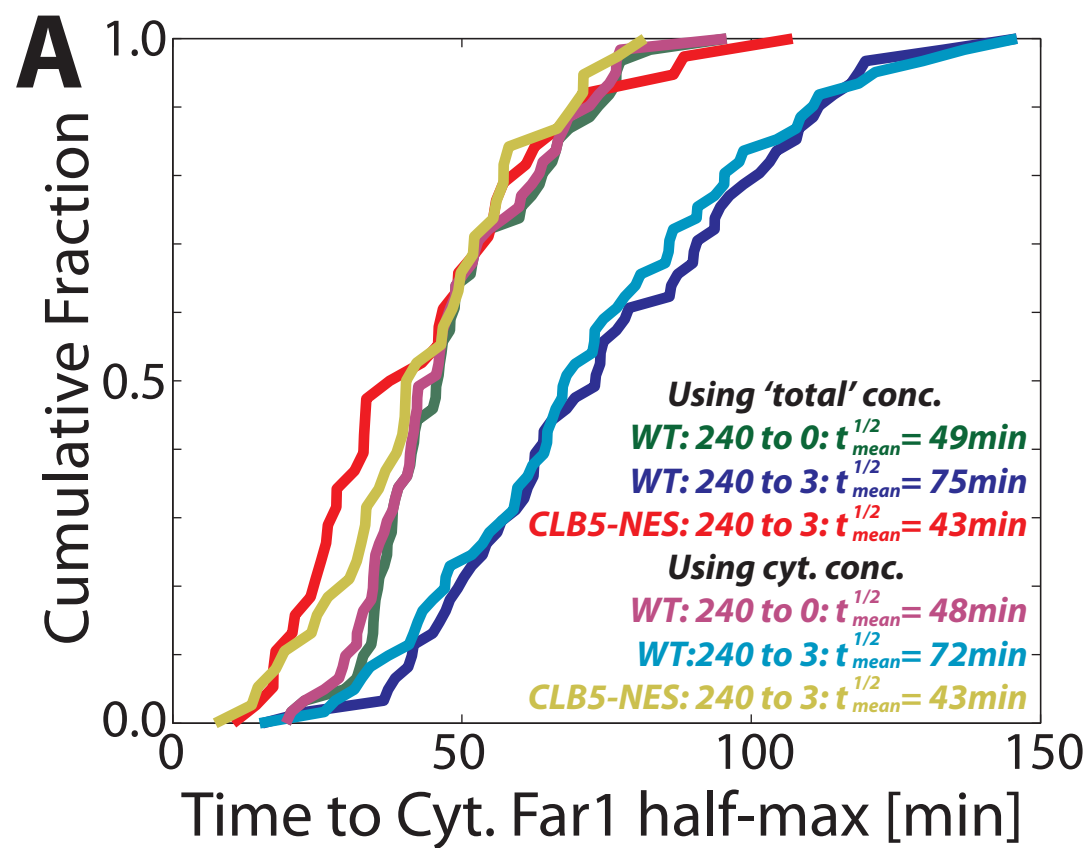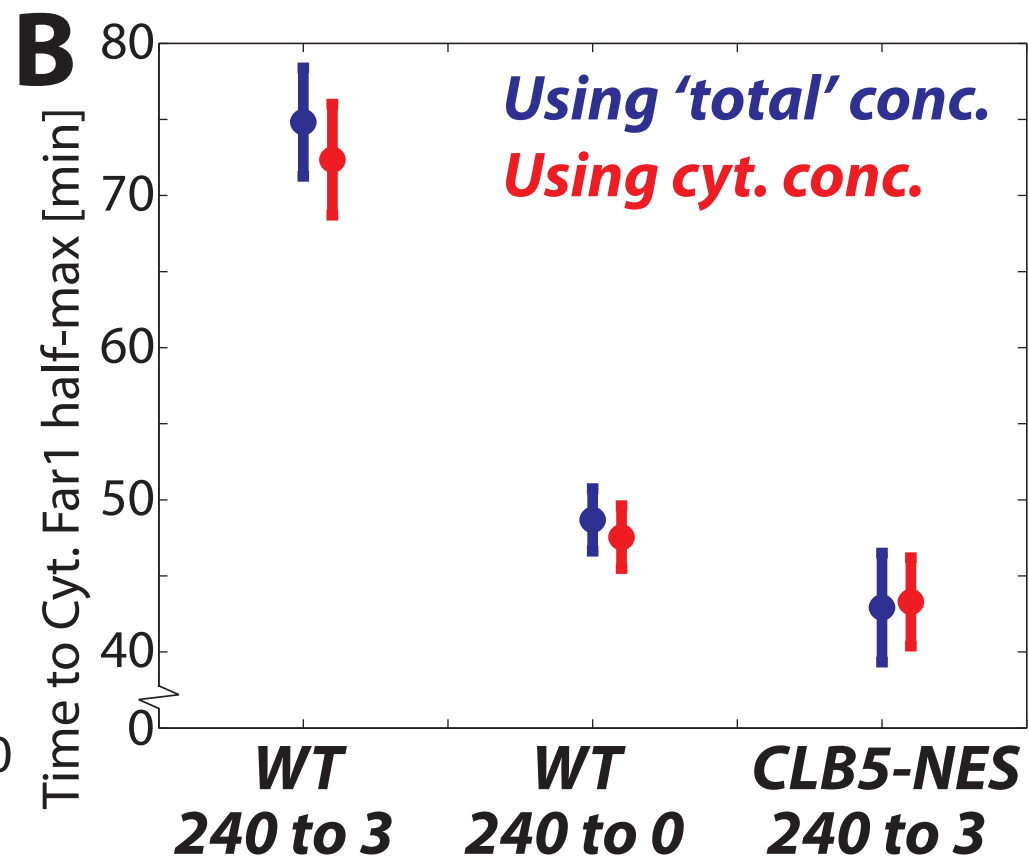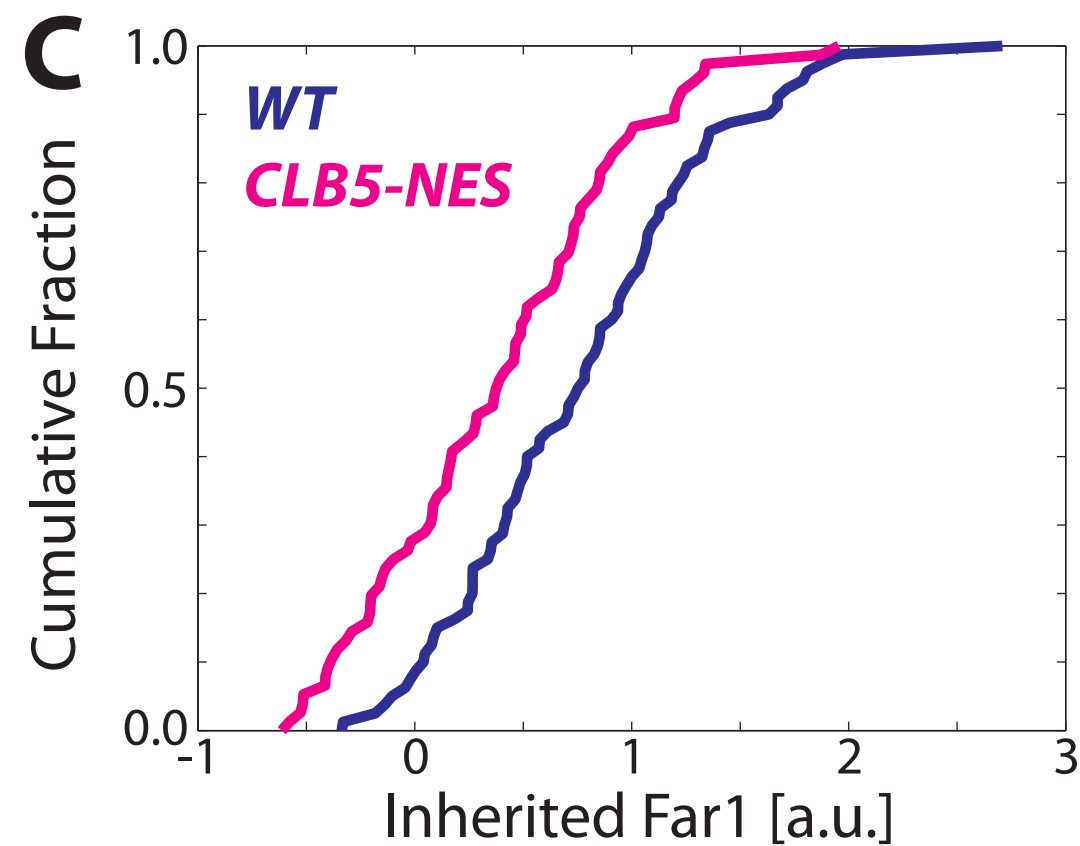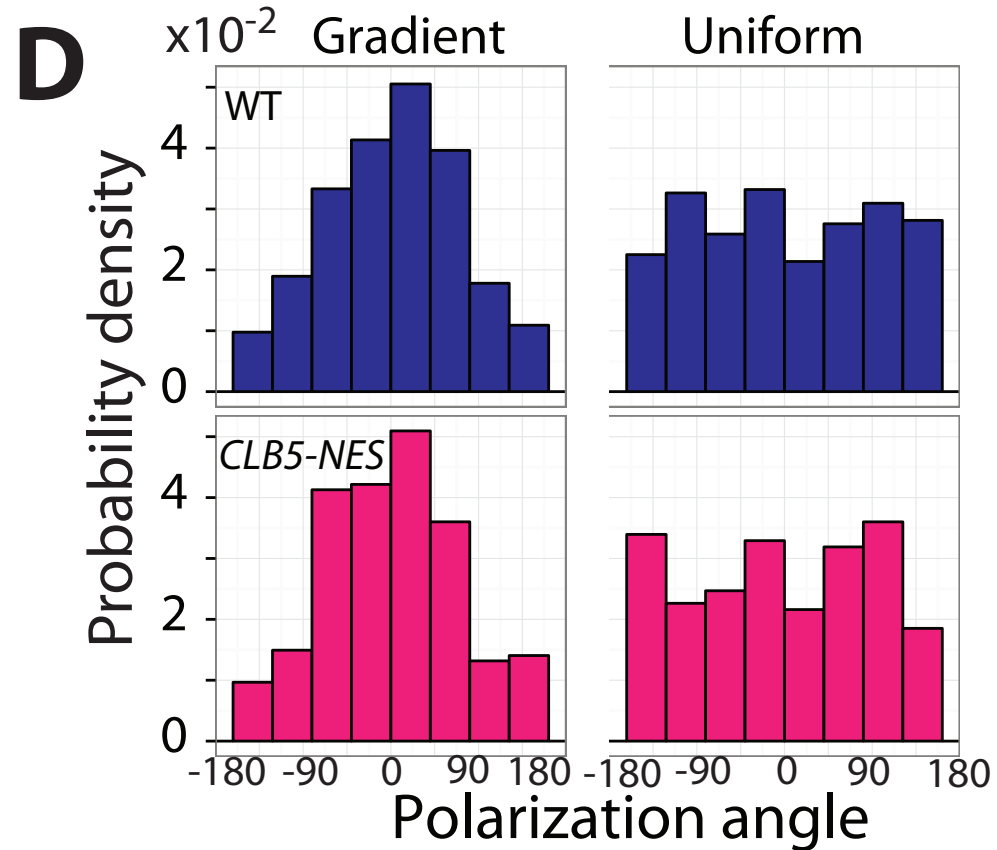

Supplement: NIHMS666519-supplement-5.pdf [file NIHMS666519-supplement-5.pdf]

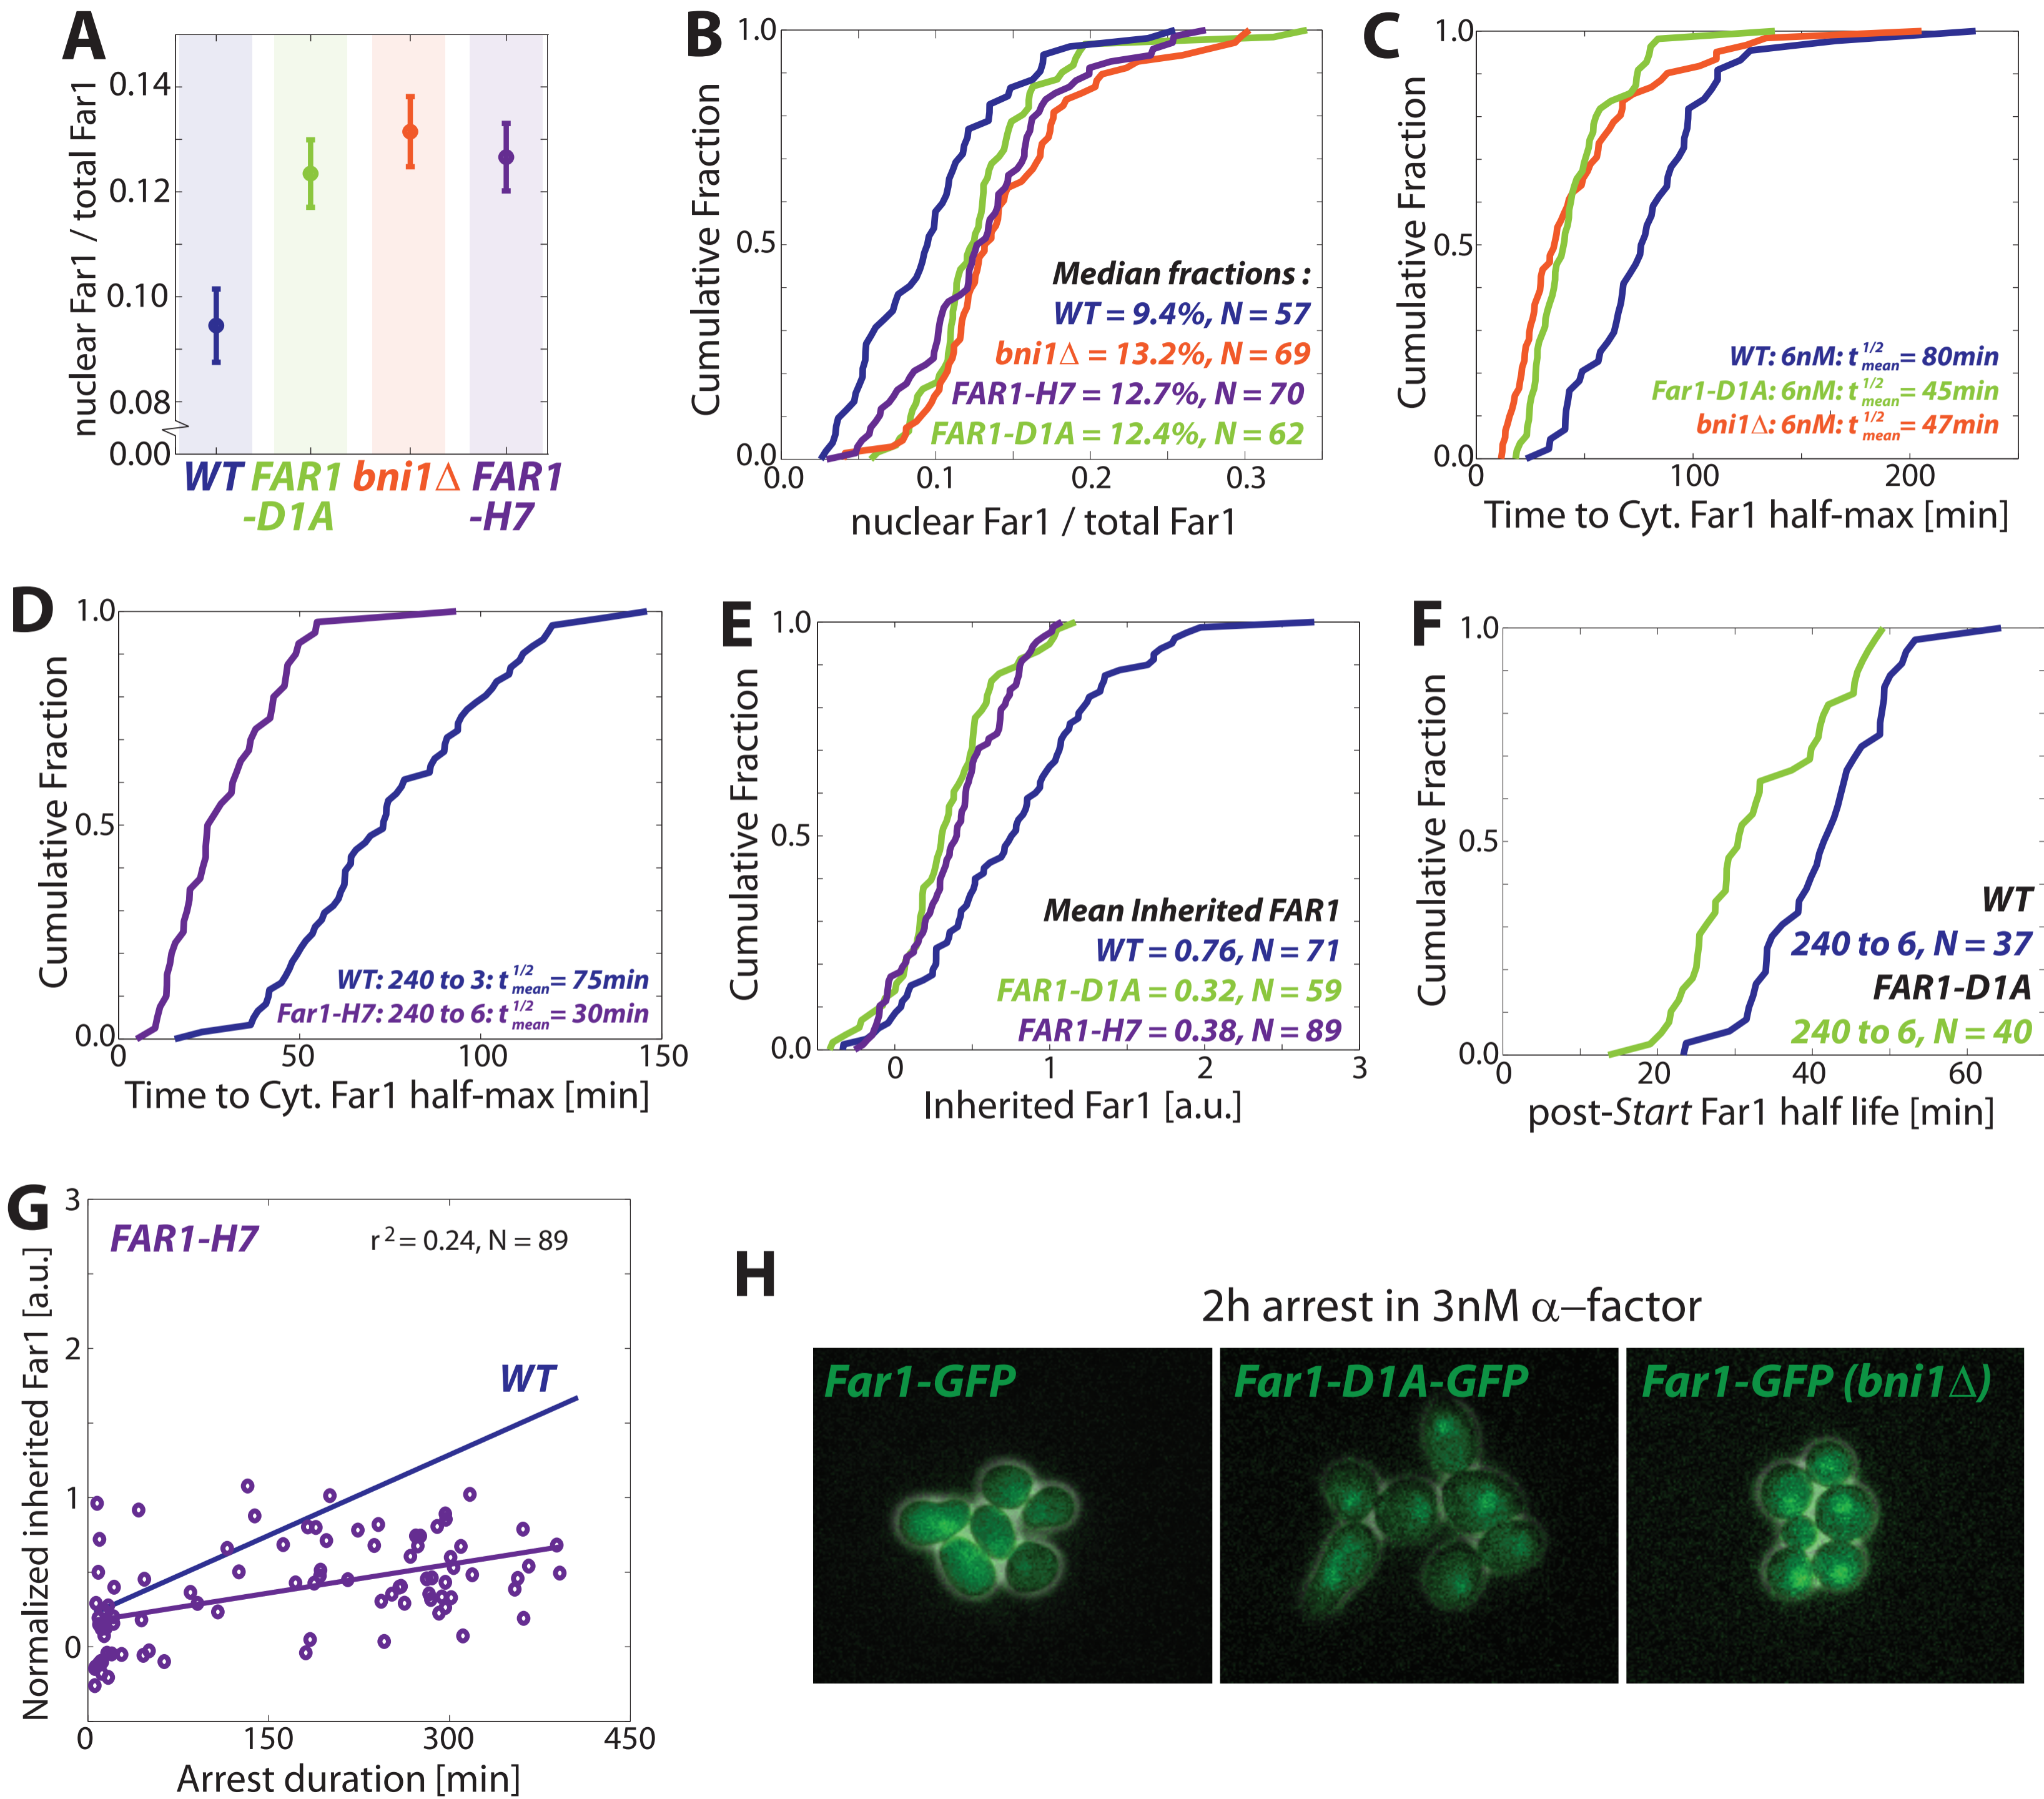

Supplement: NIHMS666519-supplement-6.pdf [file NIHMS666519-supplement-6.pdf]

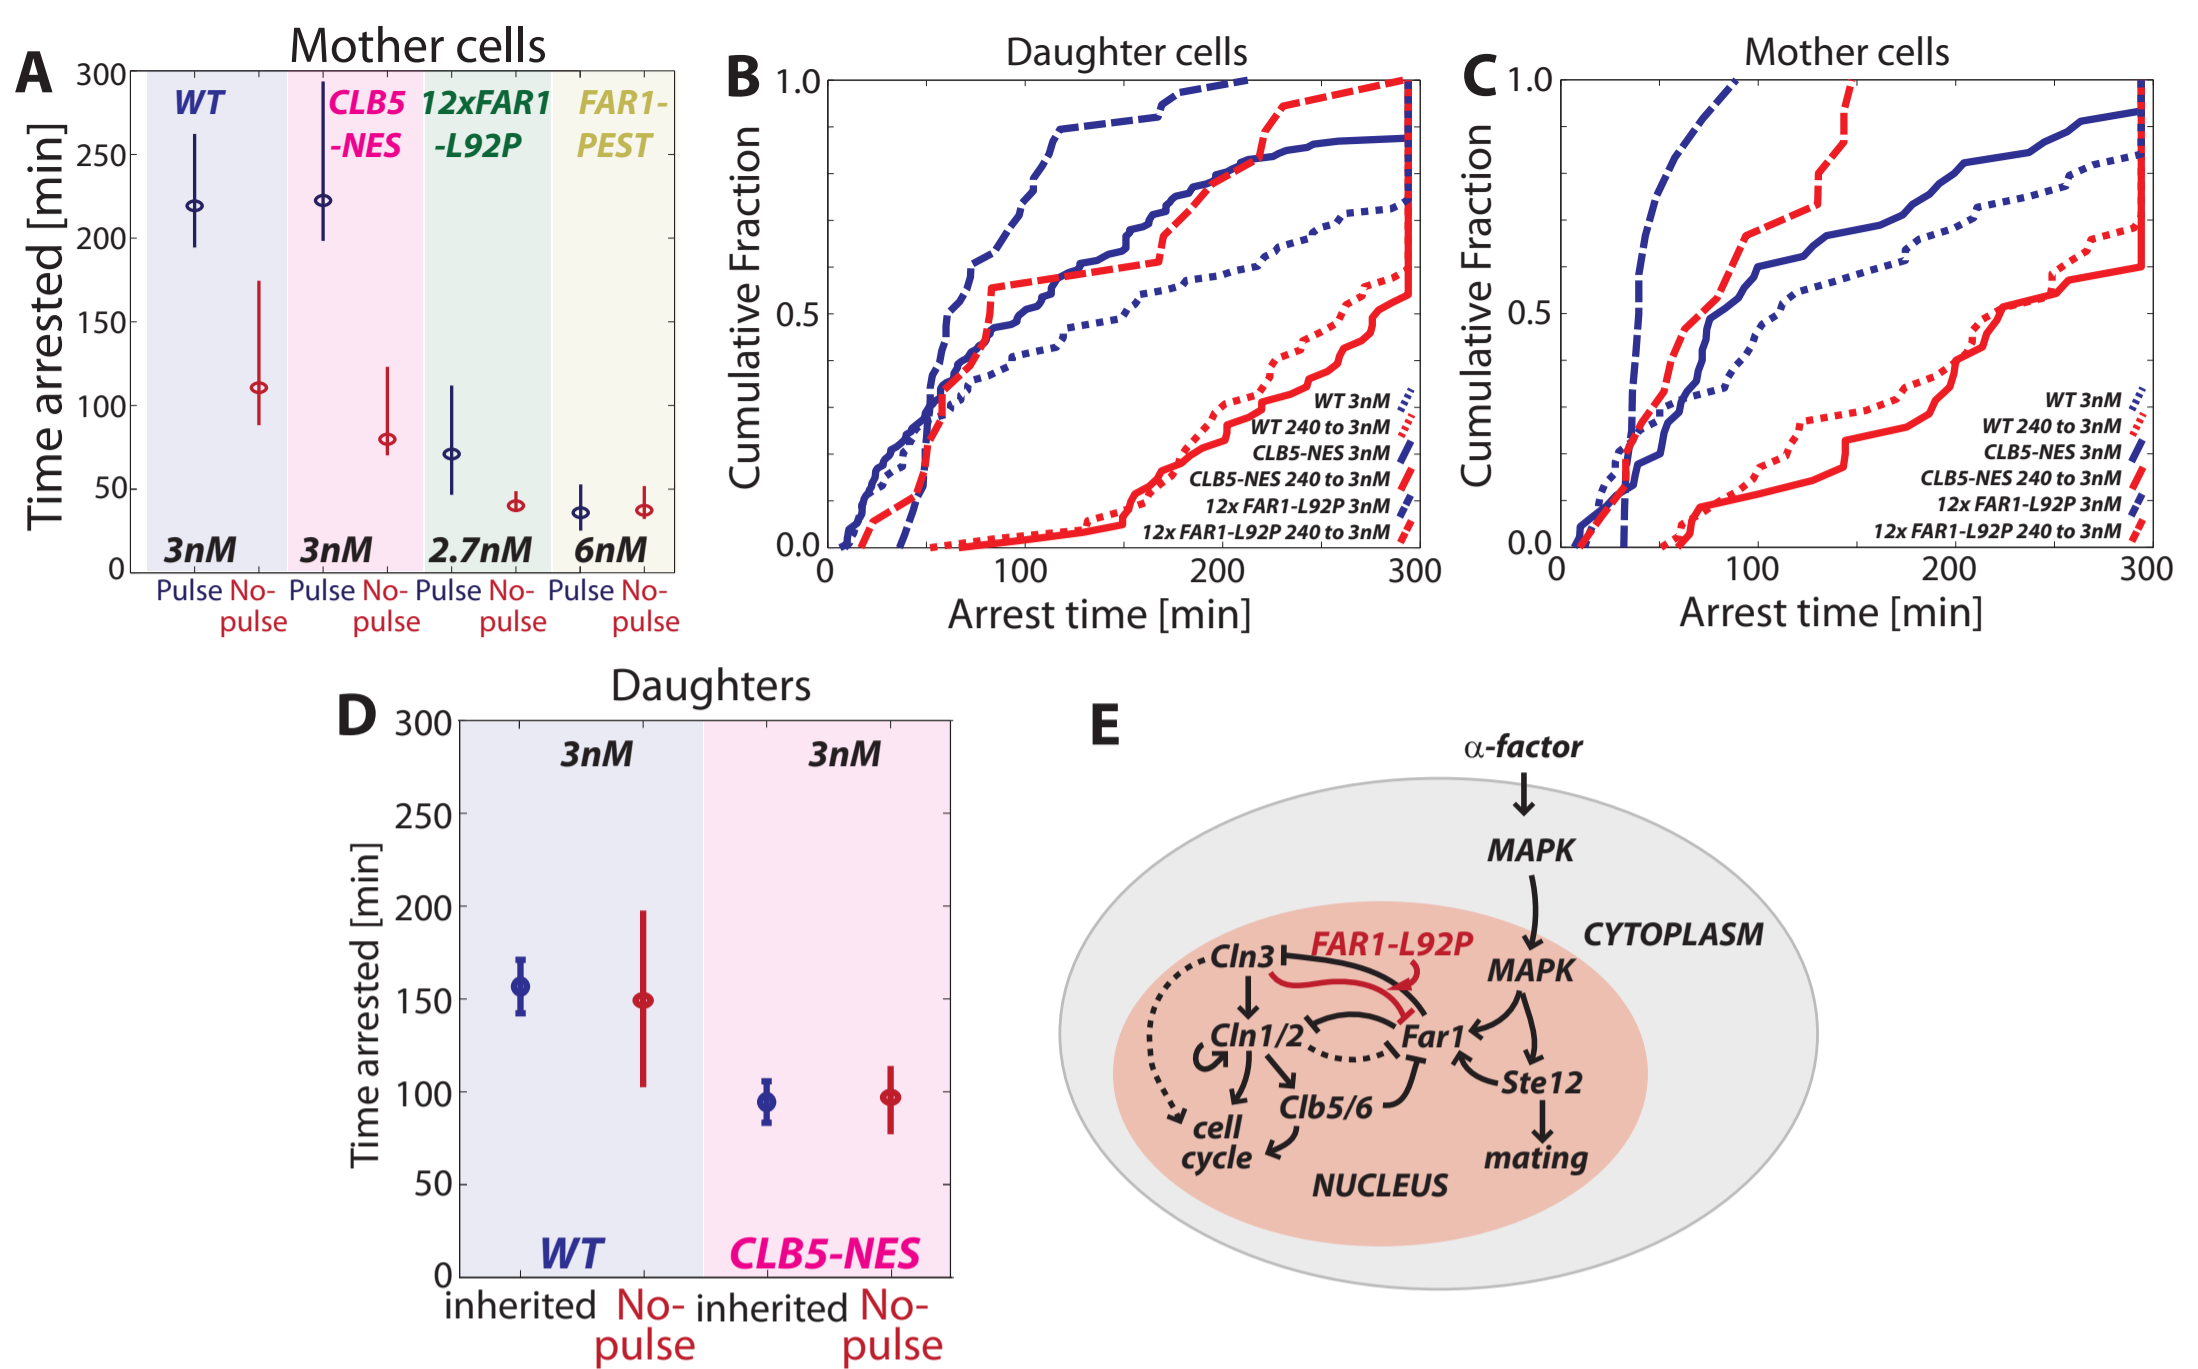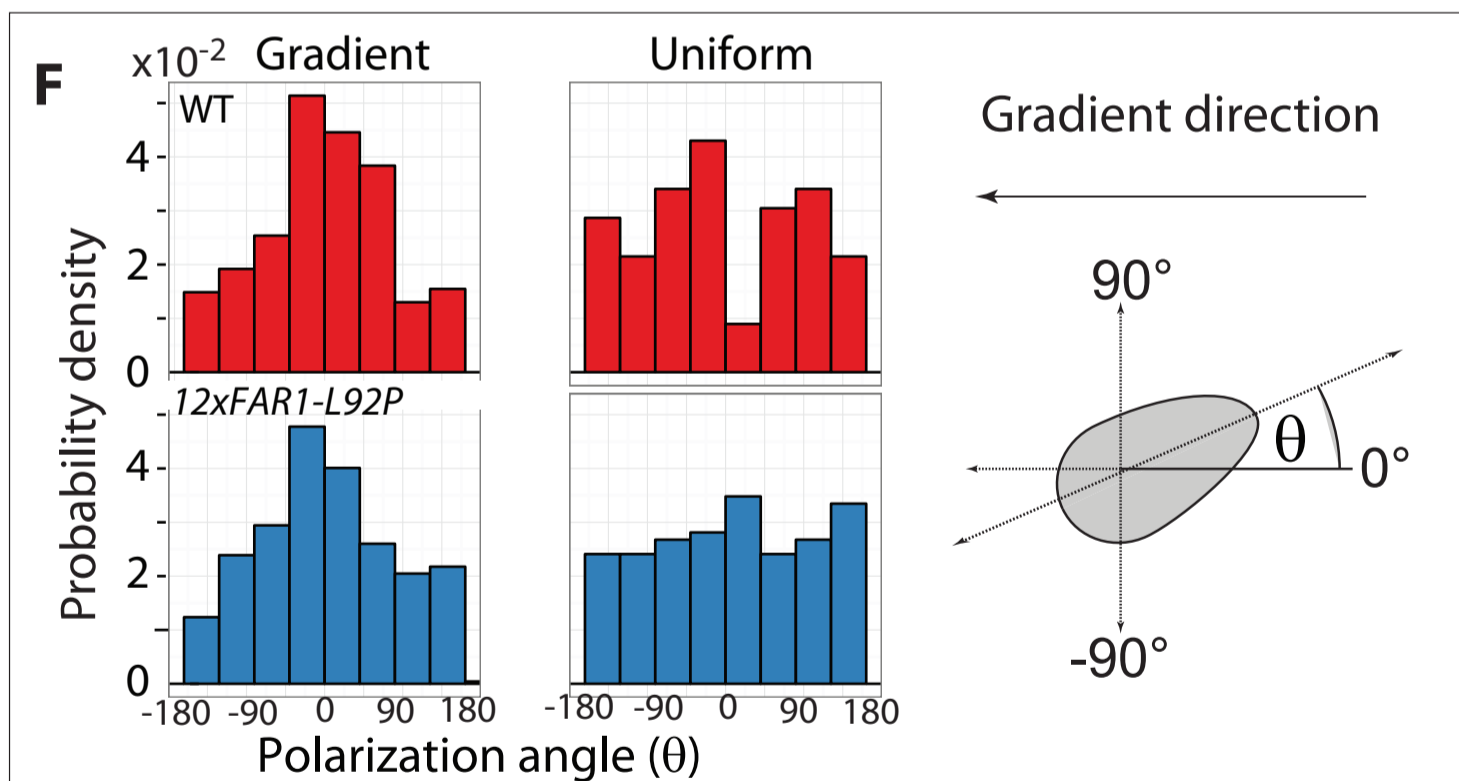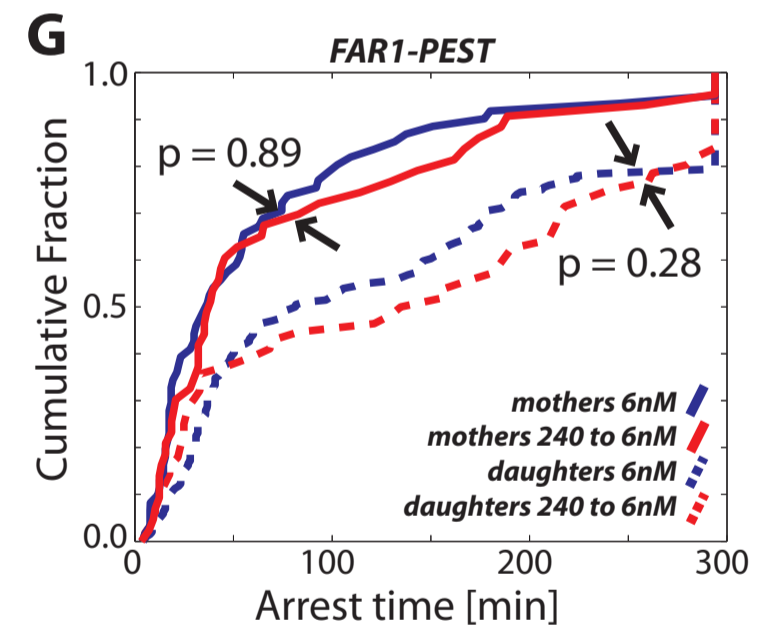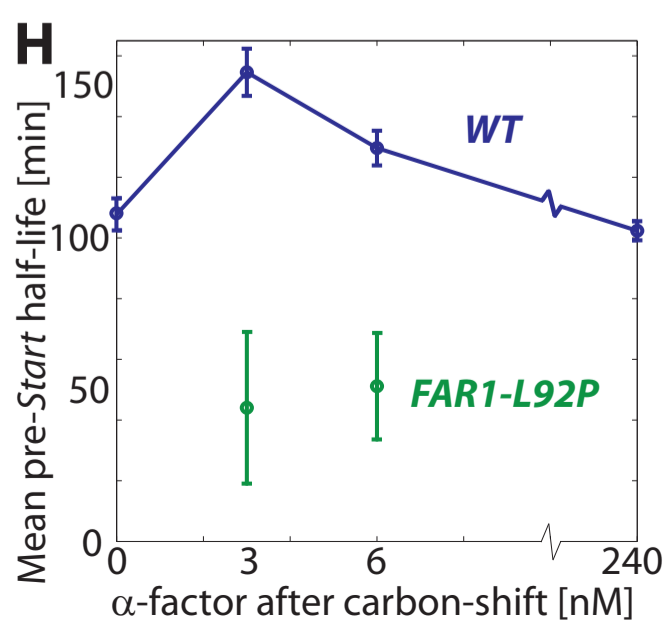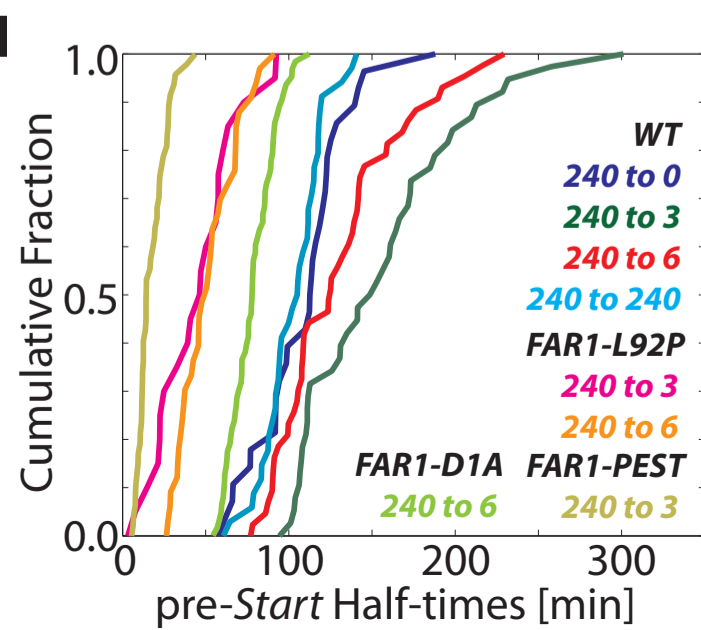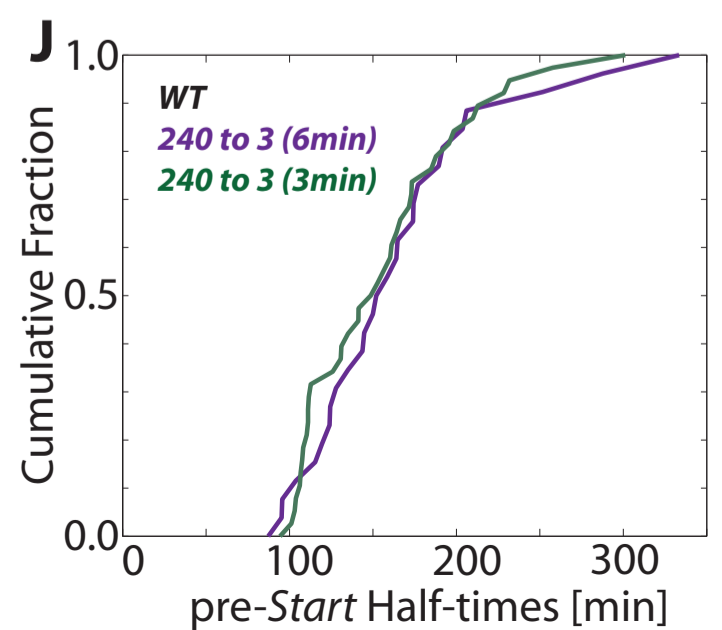

Supplement: NIHMS666519-supplement-7.pdf [file NIHMS666519-supplement-7.pdf]
